# Supplementary material for: Identification and Characterization of the miRNA Transcriptome of Ovis aries
Source: PLoS One. 2013 Mar 13;8(3):e58905. doi: 10.1371/journal.pone.0058905 (PMC3596360; doi:10.1371/journal.pone.0058905)
Supplement: Table S17 — Alignment of isomiRs for predicted miRNAs (Group 3b) that could be mapped to known pre-miRNAs of selected species (Mammalia) but unmapped to species specific ( Ovis aries ) genome. (XLS) [file pone.0058905.s021.xls]

## Sheet: compZSF_gp3b_aln
Supplementary Table S17. Alignment of isomiRs for predicted miRNAs (Group 3b) that could be mapped to known pre-miRNAs of selected species (Mammalia) but unmapped to species specific (Ovis aries) genome
(1). An example of the pre-miRNA sequences was shown in "cfa-let-7a-1" row, where the horizontals represented the identical bases; the capital letters presented the one miRNA sequence. (2). An example of the sequenced sequences (sequ seqs) was shown in "88_33398" row, where the first numbers indicated the sequ seq identification (e.g. 88_33398) composed of the index and the copy number of the seq…
cluster#=1 referenceSeqID=bta-let-7a-2 reads#=42312 mir#=45
bta-let-7a-2 aggtTGAGGTAGTAGGTTGTATAGTTtagaattacatcaagggagataactgtacagcctcctagctttcct
bta-let-7a-1 gggaTGAGGTAGTAGGTTGTATAGTTtagggtcacacccagggagataaCTATACAATCTACTGTCTTTCct
bta-let-7f-2 gggaTGAGGTAGTAGATTGTATAGTTtagggttaccccattggagataactatacagtctactgtctttccc
bta-let-7a-3 -gggTGAGGTAGTAGGTTGTATAGTTtggtctgccctgctatgggataaCTATACAATCTACTGTCTTTCct
bta-let-7g TAGTTTGTACAGTTtgagggtctatgataccacccggtacaggagataactgtacaggccactgccttgcc-
bta-let-7f-1 GTAGATTGTATAGTTgtggggtagtgattttaccctgttcaggagataactatacaatctattgccttccct
hsa-let-7g TAGTTTGTACAGTTtgagggtctatgataccacccggtacaggagataaCTGTACAGGCCACTGCCTTGCca
hsa-let-7b TAGTAGGTTGTGTGGTTtcagggcagtgatgttgcccctcggaagataaCTATACAACCTACTGCCTTCCCt
ssc-let-7a-1 aggtTGAGGTAGTAGGTTGTATAGTTtagaattgtatcaagggagataactgtacagcctcctagctttcct
ssc-let-7a-2 gggaTGAGGTAGTAGGTTGTATAGTTtagggtcacacccagggagataactatacaatctactgtctttcct
ssc-let-7g TAGTTTGTACAGTTtgagggtctatgataccacccggtacaggagataactgtacaggccactgccttg---
cfa-let-7a-2 aggtTGAGGTAGTAGGTTGTATAGTTtagaattacatcaagggagataactgtacagcctcctagctttcct
cfa-let-7a-1 ----TGAGGTAGTAGGTTGTATAGTTtggggctctgccctgctctgggtaactatacaatctactgtctttc
cfa-let-7g TAGTTTGTACAGTTtgagggtctatgataccacccggtacaggagataactgtacaggccactgccttgcc-
mdo-let-7a-2 aggtTGAGGTAGTAGGTTGTATAGTTtagaattacatcaagggagataactgtacagcctcctagctttcct
mdo-let-7a-1 gggaTGAGGTAGTAGGTTGTATAGTTtagggtcacacccagggagataactatacaatctactgtctttctt
mdo-let-7f-2 gggaTGAGGTAGTAGATTGTATAGTTtagggtcacaccctcggagataactatacagtctactgtctttccc
mdo-let-7a-3 ggggTGAGGTAGTAGGTTGTATAGTTtgggggtcgctccctctgtctgtgagataactatacagtctactgt
mdo-let-7f-1 GTAGATTGTATAGTTgtggggtagtgattttaccctgttcaggagataactatacaatctattgccttccct
mdo-let-7b GTAGGTTGTGTGGTTtcagggtagtgattttgccccaatcagaagataactatacaacctactgccttccct
mml-let-7a-2 aggcTGAGGTAGTAGGTTGTATAGTTtagaattacatcaagggagataactgtacagcctcctagctttcct
mml-let-7a-1 gggaTGAGGTAGTAGGTTGTATAGTTtagggtcacacccagggagataactatacaatctactgtctttcct
mml-let-7a-3 -gggTGAGGTAGTAGGTTGTATAGTTtggtctgccctgctatgggataactatacaatctactgtctttcct
mml-let-7b TAGTAGGTTGTGTGGTTtcagggcagtgatgttgcccctcagaagataactatacaacctactgccttccct
ptr-let-7a-2 aggtTGAGGTAGTAGGTTGTATAGTTtagaattacatcaagggagataactgtacagcctcctagctttcc-
ptr-let-7a-1 gggaTGAGGTAGTAGGTTGTATAGTTtagggtcacacccagggagataactatacaatctactgtctttcct
ptr-let-7f-2 gggaTGAGGTAGTAGATTGTATAGTTtagggttaccccattggagataactatacagtctactgtctttccc
ptr-let-7a-3 --ggTGAGGTAGTAGGTTGTATAGTTtggtctgccctgctatgggataactatacaatctactgtctttcct
ptr-let-7f-1 GTAGATTGTATAGTTgtggggtagtgattttaccctgttcaggagataactatacaatctattgccttccct
ptr-let-7b TAGTAGGTTGTGTGGTTtcagggcagtgatgttgcccctcagaagataactatacaacctactgccttccct
oan-let-7f-2 gggaTGAGGTAGTAGATTGTATAGTTtagggtcatacccttggagataaCTATACAGTCTACTGTCTTTCcc
oan-let-7g TAGTTTGTACAGTTtcagggtctacaataccacccggtataggagataaCTGTACAGGCCACTGCCTTGcca
oan-let-7f-1 TAGATTGTATAGTTtttagggtagtaattttatccttttccggagataaCTATACAATCTATTGCCTTCcct
oan-let-7e aggcTGAGGTAGTAGATTGAATAGTTgtggggtcacggcctccctgtgtgctaaCTATACAATCTACTGTCT
mmu-let-7a-2 aggtTGAGGTAGTAGGTTGTATAGTTtagagttacatcaagggagataaCTGTACAGCCTCCTAGCTTTCct
mmu-let-7c-1 gggtTGAGGTAGTAGGTTGTATGGTTtagagttacaccctgggagttaaCTGTACAACCTTCTAGCTTTCCt
mmu-let-7a-1 gggaTGAGGTAGTAGGTTGTATAGTTtagggtcacacccagggagataaCTATACAATCTACTGTCTTTCCt
mmu-let-7c-2 ggggTGAGGTAGTAGGTTGTATGGTTttgggctctgccccgctctgcggtaaCTATACAATCTACTGTCTTT
mmu-let-7g TAGTTTGTACAGTTtgagggtctatgataccacccggtacaggagataACTGTACAGGCCACTGCCTTGCca
mmu-let-7b TAGTAGGTTGTGTGGTTtcagggcagtgatgttgcccctccgaagataaCTATACAACCTACTGCCTTCCCt
rno-let-7a-2 aggcTGAGGTAGTAGGTTGTATAGTTtagagttacaacaagggagataaCTGTACAGCCTCCTAGCTTTCCt
rno-let-7a-1 gggaTGAGGTAGTAGGTTGTATAGTTtagggtcacacccagggagataaCTATACAATCTACTGTCTTTCCt
rno-let-7b TAGTAGGTTGTGTGGTTtcagggcagtgatgtcgcccctccgaagataaCTATACAACCTACTGCCTTCCCt
eca-let-7a aggtTGAGGTAGTAGGTTGTATAGTTtagaattacatcaagggagataactgtacagcctcctagctttcct
eca-let-7a-2 -gggTGAGGTAGTAGGTTGTATAGTTtggggctctgccctgctatggggtaactatacaatctactgtcttt
88_33398 TGAGGTAGTAGTTTGTACAGTT 820,746,74,22,20,2,5
436_4907 TGAGGTAGTAGTTTGTACAGT 784,710,74,21,19,2,5
1164_1435 TGAGGTAGTAGTTTGTACAGTTT 855,782,73,23,21,2,5
5601_259 GAGGTAGTAGTTTGTACAGTT 778,704,74,21,19,2,5
7898_177 TGAGGTAGTAGGTTGTATGGTTTT 885,848,37,24,23,1,5
6896_204 TGAGGTAGTAGTTTGTACAG 749,674,75,20,18,2,5
8487_173 TGAGGTAGTAGTTTGCACAGTT 752,672,80,22,19,3,5
8940_154 CTGAGGTAGTAGTTTGTACAGTT 863,749,114,23,20,3,5
8038_172 TGAGGTAGTAGTTTGTACA 707,634,73,19,17,2,5
9138_147 TGAGGTAGTAGTTTGTAC 665,592,73,18,16,2,5
8654_161 NGAGGTAGTAGTTTGTACAGTT 439,384,55,22,19,3,5
13978_92 TGAGGTAGTAGTTTGAACAGTT 744,668,76,22,19,3,5
16914_88 TGAGGTAGGAGTTTGTACAGTT 678,601,77,22,19,3,5
23919_52 TGAGGTAGTAGATTGACTAGTT 743,719,24,22,21,1,5
24380_59 TGAGGCAGTAGTTTGTACAGTT 684,606,78,22,19,3,5
23078_59 TGAGGGAGTAGTTTGTACAGTT 657,583,74,22,19,3,5
25631_43 CTGAGGTAGTAGTTTGTACAGT 821,707,114,22,19,3,5
24246_46 GAGGTAGTAGTTTGTACAGT 725,652,73,20,18,2,5
33928_47 TGAGGTAGTAGTTTGTACCGTT 715,630,85,22,19,3,5
30642_38 TGAGGTAGTAGATTGCATAGTTT 788,772,16,23,22,1,5
37517_37 TGAGGTAGCAGTTTGTACAGTT 706,626,80,22,19,3,5
37103_32 TGAGGTAGTAGTTTGCACAGT 688,609,79,21,18,3,5
40067_26 TGAGGTAGTAGTTTGNACAGTT 737,667,70,22,19,3,5
45817_28 TGAGGTAGTCGTTTGTACAGTT 692,613,79,22,19,3,5
42983_24 TGAGGTAGTAGTTTGGACAGTT 748,672,76,22,19,3,5
52342_27 TGAGGAAGTAGTTTGTACAGTT 613,545,68,22,19,3,5
62520_18 TGAGGTAGAAGTTTGTACAGTT 701,622,79,22,19,3,5
53272_17 TGAGGTAGTAGTTTGAACAGT 708,634,74,21,18,3,5
41536_26 NGAGGTAGTAGTTTGTACAGT 412,357,55,21,18,3,5
65675_14 TGAGGTAGGAGTTTGTACAGT 646,567,79,21,18,3,5
83005_10 CTGAGGTAGTAGTTTGTACAGTTT 906,791,115,24,21,3,5
103161_12 TGAGGTAGTAGTTTGTACAGCT 707,627,80,22,19,3,5
85116_12 TGAGGTAGTAGTTTGTCCAGTT 680,602,78,22,19,3,5
133039_11 TGCGGTAGTAGTTTGTACAGTT 704,620,84,22,19,3,5
105826_10 TGAGGTAGTAGCTTGTACAGTT 732,679,53,22,20,2,5
113231_9 TGAGGTAGCAGATTGTATAGTTT 770,748,22,23,22,1,5
94214_9 TGAGGTAGTCGATTGTATAGTTT 751,736,15,23,22,1,5
139778_10 TGAGGTCGTAGTTTGTACAGTT 732,653,79,22,19,3,5
110081_8 TGAGGCAGTAGATTGTATAGTTT 801,782,19,23,22,1,5
94297_11 TGAGGTAGCAGTTTGTACAGT 643,565,78,21,18,3,5
89820_10 TGAGGGAGTAGTTTGTACAGT 639,564,75,21,18,3,5
93292_8 TGAGGTNGTAGTTTGTACAGTT 770,690,80,22,19,3,5
115647_6 TGAGGTAGTAGATTGGATAGTTT 774,759,15,23,22,1,5
118422_6 GAGGTAGTAGTTTGTACAGTTT 817,742,75,22,20,2,5
124699_7 TGAGGTAGTGGTTTGTACAGTT 702,617,85,22,19,3,5
125019_6 TGAGGTAGTAGTTTGCACAGTTT 792,716,76,23,20,3,5
121208_7 TGAGGCAGTAGTTTGTACAGT 619,545,74,21,18,3,5
128271_6 TGAGGTAGTAGTTTGTACAGC 714,622,92,21,18,3,5
156999_5 TGAGGTAGTAGATTGTCTAGTTT 733,711,22,23,22,1,5
224373_6 TGAGGTAGTCGTTTGTACAGT 663,577,86,21,18,3,5
134446_5 GTGAGGCAGTAGGTTGTATAGTT 699,680,19,23,22,1,5
94569_9 NGAGGTAGTAGTTTGTACAGTTT 418,369,49,23,20,3,5
228561_4 TGAGGTAGTAGTTTGTNCAGTT 761,686,75,22,19,3,5
153864_4 GGAGGTAGTAGTTTGTACAGTT 779,684,95,22,19,3,5
159587_4 TGAGGTAGTAGTTCGTACAGTT 746,659,87,22,19,3,5
176815_4 TGAGGCAGTAGTTTGTACAGTTT 713,637,76,23,20,3,5
177502_4 TGAGGTAGTAGTTTGNACAGT 706,634,72,21,18,3,5
290907_4 TGCGGTAGTAGTTTGTACAGT 717,632,85,21,18,3,5
150968_5 TGAGGAAGTAGTTTGTACAGT 570,501,69,21,18,3,5
209201_4 GAGGTAGTAGTTTGTACAG 700,626,74,19,17,2,5
193799_3 TGAGGTAGTAGATTGTATAGTTTTT 916,808,108,25,22,3,5
397608_3 TGAGGTAGTAGTTTGTACGGTT 832,735,97,22,19,3,5
228121_3 CTGAGGCAGTAGGTTGTATAGTT 725,716,9,23,22,1,5
236787_3 CTGAGGTAGTAGTTTGTACAG 787,675,112,21,18,3,5
221917_3 GAGGTAGTAGTTTGTCCAGTT 731,655,76,21,18,3,5
200098_3 TGAGGTAGTAGTGTGTACAGTT 694,614,80,22,19,3,5
316315_2 TGAGGTAGTAGATCGTATAGTTT 856,833,23,23,22,1,5
185280_3 TAGTAGTTTGTACAGTT 597,529,68,17,15,2,5
311977_2 TGAGGCAGTAGGTTGTATGGTTTT 779,769,10,24,23,1,5
731383_2 TGAGGTAGTAGAGTGTATAGTTT 788,765,23,23,22,1,5
408050_2 TGAGGTAGTAGATTGTATAGCTT 784,764,20,23,22,1,5
269986_2 TGAGGTAGTGGATTGTATAGTTT 783,759,24,23,22,1,5
726616_2 TGAGGTAGTAGTTTGTACAGCTT 838,744,94,23,20,3,5
410910_2 TGAGGTAGTAGTTTGTNCAGTTT 809,729,80,23,20,3,5
300447_2 TGTGGTAGTAGTTTGTACAGTT 818,720,98,22,19,3,5
352002_2 TGAGGTAGTAGTTTGNACAGTTT 772,706,66,23,20,3,5
281396_2 TGAGGTAGTAGTTTGTACANTT 759,691,68,22,19,3,5
366888_2 CTGAGGTAGTAGTTTGTACA 799,679,120,20,17,3,5
575649_2 TGAGGTAGTAGGTTGTCTGGTTTT 698,679,19,24,23,1,5
246042_2 TGAGGTNGTAGTTTGTACAGT 752,671,81,21,18,3,5
287885_2 TGAGGTAGTAGTTTGGACAGT 735,656,79,21,18,3,5
1164040_2 TGAGGTAGTAGTTTGTACCGTTT 706,628,78,23,20,3,5
262701_2 GTAGTAGTTTGTACAGTT 705,626,79,18,16,2,5
270856_2 CTGAGGTAGTAGTTTGTAC 738,621,117,19,16,3,5
336687_2 GAGGTAGCAGTTTGTACAGTT 671,584,87,21,18,3,5
817958_2 TGAGGTAGAAGTTTGTACAGT 650,571,79,21,18,3,5
189557_3 GTAGTTTGTACAGTT 574,309,265,15,8,7,5
1225871_1 GTGAGGTAGTAGGTTGTATGGTT 880,840,40,23,22,1,5
1711387_1 TGAGGTAGTAGTTTGTACAGTTTC 949,830,119,24,21,3,5
978232_1 CTGAGGTAGTAGGTTATATAGTT 832,818,14,23,22,1,5
1225451_1 TGAGGTAGTAAATTGTATAGTTT 828,813,15,23,22,1,5
866310_1 CTGAGGTAGTAGTTTGTATAGTT 888,808,80,23,21,2,5
2032008_1 CTGAGGTAGTAGGTTCTATAGTT 812,801,11,23,22,1,5
1274961_1 CTGAGGTAGTAGGTTNTATAGTT 794,787,7,23,22,1,5
1992543_1 GTGAGGTAGTAGGTTTTATAGTT 791,774,17,23,22,1,5
1761736_1 GTGAGGTAGGAGGTTGTATAGTTT 772,763,9,24,23,1,5
1806429_1 GTGAGGTAGTAGGTTGCATAGTT 780,761,19,23,22,1,5
1741242_1 TGAGGTAGTCGTTTGTACAGTTT 835,743,92,23,20,3,5
649309_1 TGAGATAGTAGTTTGTACAGTT 815,722,93,22,19,3,5
820636_1 CTGAGGGAGTAGTTTGTACAGTT 826,710,116,23,19,4,5
1642288_1 TGAGGTAGTAGTTTGAACAGTTT 792,710,82,23,20,3,5
1707968_1 TGAGGTAGTAGGTTGCATGGTTTT 725,706,19,24,23,1,5
1866148_1 CTGAGGTCGTAGGTTGTATAGTT 708,698,10,23,22,1,5
2045993_1 CTGAGGTAGTAGCTTGTATAGTT 695,685,10,23,22,1,5
917763_1 TGAGGTAGTAGTTTGTGCAGTTT 750,671,79,23,20,3,5
1443673_1 GTGAGGTCGTAGGTTGTATAGT 686,668,18,22,21,1,5
1182563_1 TAAGGTAGTAGTTTGTACAGT 758,663,95,21,18,3,5
680284_1 GTGGTAGTAGTTTGTACAGTT 739,651,88,21,18,3,5
1832059_1 TGAGGTAGTAGTTTGTNCAGT 725,649,76,21,18,3,5
459405_1 CTGAGGTAGTGGGTTGTATAGT 658,648,10,22,21,1,5
1991051_1 CTGAGGTAGTACGTTGTATAGTT 657,646,11,23,22,1,5
1097390_1 TGAGGTAGGAGATTGTATAGTTTT 701,645,56,24,22,2,5
1430749_1 TGAGGTAGTAGTTTGTACAGNT 711,641,70,22,19,3,5
1143568_1 TGAGGTAGTAGTTTGNACAG 709,631,78,20,17,3,5
1918485_1 TGAGGTAGTAGTTTGCACAG 715,630,85,20,17,3,5
1607788_1 TGAGGTAGTAGCTTGAATAGTT 640,629,11,22,21,1,5
678959_1 TGAGGTAGGAGTTTGTACAGTTT 703,626,77,23,20,3,5
534654_1 TGCGGTAGTAGTTTGTACAGTTT 669,612,57,23,20,3,5
2013408_1 TGAGGTAGTAGTTTGAACAG 679,602,77,20,17,3,5
507019_1 CTGCGGTAGTAGGTTGTATAGTT 611,592,19,23,22,1,5
1685925_1 CTGAGGTAGTAGTTTNTACAGTT 676,589,87,23,19,4,5
1038945_1 TGAGGTAGTAGTTTGGTCAGTT 648,583,65,22,18,4,5
1728934_1 CTGAGGTAGTAGCTTGTATAGT 592,582,10,22,21,1,5
1446566_1 GGTAGTAGTTTGTACAGTT 642,581,61,19,17,2,5
1459131_1 GGTAGTAGTTTGTACAGT 646,581,65,18,16,2,5
1052035_1 TGAGGTAGTAGTGTGTACAGT 641,580,61,21,18,3,5
737865_1 TGAGGTAGGAGTTTGTACAG 665,574,91,20,17,3,5
1993033_1 TGAGGTAGTAGTTTTTACAGTTT 634,573,61,23,20,3,5
1425511_1 GGAGGTAGTAGTTTGTACAGT 641,569,72,21,18,3,5
1892961_1 GAGGTAGTAGTTTGTTCAGTT 619,568,51,21,18,3,5
1661203_1 TGAGGTAGTCGATTGAATAGTT 577,567,10,22,21,1,5
980214_1 TGTGGTAGTAGATTGTATAGTTT 589,566,23,23,22,1,5
1966361_1 TGAGGTAGTAGTGTGTACAGTTT 639,566,73,23,20,3,5
761140_1 TGAGGTAGTAGTTTGTACAGGT 639,566,73,22,19,3,5
1046335_1 TGAGGGAGTAGATTGAATAGTT 574,566,8,22,21,1,5
1773321_1 TGAGGTAGTAGTTTGCACA 646,564,82,19,16,3,5
1116770_1 TGAGGTAGTAGTTTGAA 580,537,43,17,15,2,5
561082_1 TGAGGTAGTCGTTTGTACAG 621,528,93,20,17,3,5
634764_1 TGAGGTAGGAGTTTGTACAGTC 612,521,91,22,18,4,5
699057_1 GAGGTACTAGTTTGTACAGTT 572,517,55,21,18,3,5
553042_1 TGAGGTAGAAGATTGAATCGTT 519,497,22,22,20,2,5
1217349_1 CTGAGGTAGTCGGTTGTATAGTT 507,495,12,23,22,1,5
979336_1 TGAGGTAGCAGTTTGTACA 549,483,66,19,16,3,5
1908969_1 TGAGGTAGCAGTTTGTACAG 552,481,71,20,17,3,5
1013133_1 NTGAGGTAGTAGTTTGTACAGTT 531,467,64,23,20,3,5
1211896_1 GAGGTAGTAGTTTGCACAGT 513,450,63,20,17,3,5
633852_1 TGAGGCAGTAGTTTGTACCGTT 528,448,80,22,18,4,5
1502666_1 NTGAGGTAGTAGTTTGTACAGTTT 505,442,63,24,21,3,5
881666_1 TGAGGTAGTAGTTCGTACAGT 467,437,30,21,18,3,5
1633282_1 TGAGGTCGTAGTTTGTAC 510,435,75,18,15,3,5
1087380_1 NAGGTAGTAGTTTGTACAGTT 498,434,64,21,18,3,5
835479_1 TGAGGGAGTAGTTTGTACA 388,351,37,19,16,3,5
955264_1 NGAGGTAGTAGTTTGTAC 336,275,61,18,15,3,5
153570_5 CTATACAACCTACTGCCTTCCC 849,812,37,22,21,1,3
1347702_1 CTATACAATCTACTGTCTTTTTT 864,840,24,23,22,1,3
1269209_1 TATACAACCTACTGCCTTCCC 763,724,39,21,20,1,3
1182041_1 TATACAACCTACCGCCTTCCT 515,490,25,21,19,2,3
cluster#=2 referenceSeqID=bta-mir-181b-1 reads#=53 mir#=30
bta-mir-181b-1 cttgggcagaggttctttcttaaaaggtcacaatcAACATTCATTGCTGTCGGTGGGTTgaactgtgtggacaagctcactgaacaatgagtgcaactgtggccccgcat
bta-mir-181d -tcccctcccttaggccacagcgaaggtcacaatcAACATTCATTGTTGTCGGTGGGTtg-tgacagagaccagacccaccgagggatgaatgtcactgtggctgggcca
bta-mir-181b-2 --------------------ctgatggctgcactcAACATTCATTGCTGTCGGTGGGTTtgac--tttgaatcaactcactgatcaatgaatgaaactgcggaccaaaca
hsa-mir-181b-1 cctgtgcagagattattttttaaaaggtcacaatcAACATTCATTGCTGTCGGTGGGTtgaactgtgtggacaagctcactgaacaatgaatgcaactgtggccccgctt
hsa-mir-181b-2 --------------------ctgatggctgcactcAACATTCATTGCTGTCGGTGGGTttga--gtctgaatcaactcactgatcaatgaatgcaactgcggaccaaaca
hsa-mir-181d gtcccctcccctaggccacagccgaggtcacaatcAACATTCATTGTTGTCGGTGGGTtgaggactgaggccagacccaccgggggatgaatgtcactgtggctgggcca
ssc-mir-181b-1 -------------------------ggtcacaatcAACATTCATTGCTGTCGGTGGGTTgaactgtgtagacaagctcactgaacaatgaatgcaactgtggccc-----
ssc-mir-181b-2 -----------------------atggctgcactcAACATTCATTGCTGTCGGTGGGTTtga--gtctgaatcaactcactgatcaatgaatgcaactgcggaccaaaca
ssc-mir-181d ---------------------------tcacaatcAACATTCATTGTTGTCGGTGGGTTggagacggaggccagaCCCACCGAGGGATGAATGTCACtgtggctgg----
cfa-mir-181b-1 -----------------------------------AACATTCATTGCTGTCGGTGggttgaactgtgtggacaagctcactgaacaatgaatgcaac-------------
cfa-mir-181b-2 -----------------------------------AACATTCATTGCTGTCGGTGggtttga--gtctgaatcaactcactgatcaatgaatgcaaa-------------
cfa-mir-181d -----------------------------------AACATTCATTGTTGTCGGTGGGTtgtgaggacggaggccagacccaccgagggatgaatgtcac-----------
mdo-mir-181b -----------------------aaggtcacaatcAACATTCATTGCTGTCGGTGGGtttaactgtatggacaagctcactgaacaatgaatgcaactgtggccccactt
mml-mir-181b-1 cctgtgcagagattattttttaaaaggtcacaatcAACATTCATTGCTGTCGGTGGGTTgaactgtgtagacaagctcactgaacaatgaatgcaactgtggccccgctt
mml-mir-181b-2 --------------------ctgatggctgcactcAACATTCATTGCTGTCGGTGGGTTtga--gtctgaatcaactcactgatcgatgaatgcaactgcggaccaaaca
mml-mir-181d gtcccctcccctaggccacagccaaggtcacaatcAACATTCATTGTTGTCGGTGGGTtgaggaccgaggccagacccaccgggggatgaatgtcactgtggctgggcca
ptr-mir-181b-1 cctgtgcagagattattttttaaaaggtcacaatcAACATTCATTGCTGTCGGTGGGTtgaactgtgtggacaagctcactgaacaatgaatgcaactgtggccccgc--
ptr-mir-181b-2 ---------------------tgatggctgcactcAACATTCATTGCTGTCGGTGGGTttga--gtctgaatcaactcactgatcgatgaatgcaactgcggaccaaaca
ptr-mir-181d -tcccctcccctaggccacagccgaggtcacaatcAACATTCATTGTTGTCGGTGGGTtgaggaccgaggccagacccaccgggggatgaatgtcactgtggctgggcca
ppy-mir-181b cctgtgcagagattattgtttaaaaggtcacaatcAACATTCATTGCTGTCGGTGGGTtgaactgtgtggacaagctcactgaacaatgaatgcaactgtggccccgctt
ppy-mir-181b-2 --------------------ctgatggctgcactcAACATTCATTGCTGTCGGTGGGTttga--gtctgaatcaactcactgatcgatgaatgcaactgcggaccaaaca
ppy-mir-181d -tcccctcccctaggccacagccaaggtcacaatcAACATTCATTGTTGTCGGTGGGTtgaggaccgaggccagacccaccgggggatgaatgtcactgtggctgggcca
oan-mir-181b ---------tgcagagtttaacaaaggtcccaatgAACATTCATTGCTGTCGGTGGGTttaactctgaggacaagCTCACTGAACAATGAATGGAActgtggctcacctt
oan-mir-181c -----------------tgttgaaaagtcacaatcAACATTCATTACTGTCGGTGGGTtgtgataaatgaaaaaaCTCACCGCCAGATGAATGCCActgtggctaggcat
mmu-mir-181b-1 ------------------------aggtcacaatcAACATTCATTGCTGTCGGTGGGTtgaactgtgtagaaaagCTCACTGAACAATGAATGCaactgtggcc------
mmu-mir-181b-2 --------------------ttgatggctgcactcAACATTCATTGCTGTCGGTGGGTttga--atgtcaaccaaCTCACTGATCAATGAATGCAActgcgggccaaaaa
mmu-mir-181d -----------------------------acaattAACATTCATTGTTGTCGGTGGGTtgtgaggaggcagccagaCCCACCGGGGGATGAATGTCActgt---------
rno-mir-181b-1 cctgtgcagagatgatgtttacaaaggtcacaatcAACATTCATTGCTGTCGGTGGGTtgaactgtgtagaaaagCTCACTGAACAATGAATGCAActgtggccccgctt
rno-mir-181b-2 ---------------------tgatggctgcactcAACATTCATTGCTGTCGGTGGGTttga--atgtcaaccaaCTCACTGGTCAATGAATGCAActgcgggccaaaaa
rno-mir-181d -------------------------ggtcacaattAACATTCATTGTTGTCGGTGGGTtgtgaggagaagaccagcCCACCGGGGGATGAATGTCActgtggctggg---
79582_16 AACATTCATTGCTGTCGGTGGGATT 912,892,20,25,24,1,5
1160896_3 AACATTCATTGCTGCCGGTGGGGTT 771,756,15,25,23,2,5
372456_2 AACATTCATTGTTGTCGGTGGGTTGT 1031,991,40,26,25,1,5
349173_2 AACATTCATTGCTGTCGGTGGGTTTG 969,930,39,26,25,1,5
921766_2 AACATTCATTGCTGTAGGTGGGGTT 865,851,14,25,23,2,5
319030_2 AACATTCCTTGCTGTCGGTGGGTTT 850,834,16,25,24,1,5
368330_2 AACATTCATTGTTGTAGGTGGGT 842,830,12,23,22,1,5
156316_4 NACATTCATTGTTGTCGGTGGGT 410,405,5,23,22,1,5
1518248_2 AACATTCATTGCTGTTGGTGGGGTT 794,781,13,25,23,2,5
822931_2 ACCATTCATTGTTGTCGGTGGGTT 774,755,19,24,23,1,5
216436_3 NACATTCATTGTTGTCGGTGGGTTT 501,485,16,25,23,2,5
1321110_2 AACATTCATTGTTGCCGGTGGGT 653,634,19,23,22,1,5
1527130_1 AACATTCATTGCTGTCGGTGGGTTTGA 1011,987,24,27,26,1,5
995309_1 AACATTCATTGCTGTCGGTGGGTTTAC 868,849,19,27,26,1,5
632650_1 AACATTCATTGTTGTTGGTGGGT 821,816,5,23,22,1,5
618580_1 AACATTCATTGTTGCCGGTGGGTT 758,747,11,24,23,1,5
1280113_1 AACATTCATTGTTGTTGGTG 738,733,5,20,19,1,5
1089599_1 NACATTCATTGTTGTCGGTGGGTT 517,510,7,24,23,1,5
259325_2 CTCACTGATCAATGAATGCAAA 871,904,-33,22,21,1,3
442366_1 ACTCACTGATCAATGAATGCAA 867,900,-33,22,21,1,3
1497986_1 CTCACTGATCAATGAATGCAA 833,866,-33,21,20,1,3
1526213_1 TCACTGATCAATGAATGCAA 797,830,-33,20,19,1,3
cluster#=3 referenceSeqID=bta-mir-30f reads#=26077 mir#=27
bta-mir-30f gagggccagatacTGTAAACACCCTACACTCTCAGCTgtgcacagtgagaaagctgggagaaggctgtttactctctctgcctt
bta-mir-30c atgccgtagtgtgTGTAAACATCCTACACTCTCAGCtgtg-agctcgaggtggctgggagagggttgtttactccttctgccat
bta-mir-30b agttttcagttcaTGTAAACATCCTACACTC--AGCTgtacaca-cgagtcggCTGGGAGGTGGATGTTTACTTcagctgactt
hsa-mir-30c-2 -------agatacTGTAAACATCCTACACTCTCAGCtgtggaaagtaagaaagCTGGGAGAAGGCTGTTTACTCTttct-----
hsa-mir-30c-1 atgctgtagtgtgTGTAAACATCCTACACTCTCAGCtgtg-agctcaaggtggCTGGGAGAGGGTTGTTTACTCCttctgccat
hsa-mir-30b aagtttcagttcaTGTAAACATCCTACA--CTCAGCTgtaatacatggattggCTGGGAGGTGGATGTTTACTTCagctgactt
ssc-mir-30c-2 ----gacagatacTGTAAACATCCTACACTCTCAGCtgtggaaagtaagaaagctgggagaaggctgtttactctctctgcctt
ssc-mir-30c-1 ----cgtagtgcgTGTAAACATCCTACACTCTCAGCtgtg-agctcgaggtggctgggagagggttgtttactccttctgccat
ssc-mir-30b ---tttcagttcgTGTAAACATCCTACA--CTCAGCTgtaatacatggattggCTGGGAGGTGGATGTTTACTTcagctga---
cfa-mir-30c-2 -------------TGTAAACATCCTACACTCTCAGCTgtggaaagtaagaaagctgggagaaggctgtttactct---------
cfa-mir-30c-1 -------------TGTAAACATCCTACACTCTCAGCTgtg-agctcaaggtggctgggagagggttgtttactcc---------
cfa-mir-30b -------------TGTAAACATCCTACA--CTCAGCTgtgtaca-tggattggctgggaggtggatgtttacttc---------
age-mir-30b gagtttcagttcaTGTAAACATCCTACA--CTCAGCtgtaatacatggattggctgagaggtggatgtttacttcagctgactt
mml-mir-30c-2 -------agatacTGTAAACATCCTACACTCTCAGCtgtggaaagtaagaaagctgggagaaggctgtttactctctct-----
mml-mir-30c-1 atgctgtagtgtgTGTAAACATCCTACACTCTCAGCtgtg-agctcaaggtggctgggagagggttgtttactccttctgccat
ggo-mir-30b aagttccagttcaTGTAAACATCCTACA--CTCAGCtgtaatacatggattggctgggaggtggatgtttacttcagctgactt
ptr-mir-30c-2 -------agatacTGTAAACATCCTACACTCTCAGCtgtggaaagtaagaaagctgggagaaggctgtttactctttct-----
ptr-mir-30c-1 atgctgtagtgtgTGTAAACATCCTACACTCTCAGCtgtg-agctcaaggtggctgggagagggttgtttactccttctgccat
oan-mir-30c gagtgacaggtacTGTAAACATCCTACACTCTCAGCTgtagat-gtgagaaagCTGGGAGAAGGCTGTTTACTCTctctgcctt
oan-mir-30b gagttcgagttcaTGTAAACATCCTACA--CTCAGCTgtgcccacccag-cggCTGGGAGGGGGATGTTTGCTtcaaccgactt
mmu-mir-30c-2 gagtgacagatatTGTAAACATCCTACACTCTCAGCtgtgaaaagtaagaaagCTGGGAGAAGGCTGTTTACTCTctctgcctt
mmu-mir-30c-1 atgttgtagtgtgTGTAAACATCCTACACTCTCAGCtgtg-agctcaaggtggCTGGGAGAGGGTTGTTTACTCCttctgccat
mmu-mir-30b aagtttcagttcaTGTAAACATCCTACA--CTCAGCTgtcatacatgcgttggCTGGGATGTGGATGTTTACGTCagctgtctt
rno-mir-30c-2 gagtgacagatacTGTAAACATCCTACACTCTCAGCtgtgaaaagtaagaaagCTGGGAGAAGGCTGTTTACTCTctctgcctt
rno-mir-30c-1 atgttgtagtgtgTGTAAACATCCTACACTCTCAGCtgtg-agctcaaggtggCTGGGAGAGGGTTGTTTACTCCttctgccat
rno-mir-30b gagtttcagttcaTGTAAACATCCTACA--CTCAGCTgtcatacatgagttggCTGGGATGTGGATGTTTACGTCagctgtctt
eca-mir-30b -------------TGTAAACATCCTACACTC--AGCTgtactacatggattggctgggaggtggatgtttact-----------
122_23663 TGTAAACATCCTACACTCAGCT 827,639,188,22,17,5,5
1033_1687 TGTAAACATCCTACACTCAGC 790,642,148,21,17,4,5
13183_97 GTAAACATCCTACACTCAGCT 795,605,190,21,16,5,5
11461_119 NGTAAACATCCTACACTCAGCT 490,354,136,22,16,6,5
22084_52 TGTAAACATCCTACAGTCAGCT 767,579,188,22,16,6,5
24396_51 TGTAAACATCCTACAATCAGCT 758,574,184,22,16,6,5
40214_25 TGTAAACATCCTACACTCAG 745,638,107,20,17,3,5
49390_25 TGTAAACATCCTCCACTCAGCT 718,535,183,22,16,6,5
56019_27 TGTAAACATCCTACCCTCAGCT 647,481,166,22,16,6,5
59911_16 TGTAAACATCCTACACTCAGCTG 870,644,226,23,17,6,5
52041_18 TGTAAACATCCTACANTCAGCT 724,557,167,22,16,6,5
74942_18 TGTAAACCTCCTACACTCAGCT 704,522,182,22,16,6,5
134408_17 TGTAAACATCCTACACTCCGCT 647,535,112,22,17,5,5
71697_12 TGTAAACATCCTACACTCAGCTGT 899,673,226,24,18,6,5
73421_12 TGTAAACATCCTACACTCA 695,624,71,19,17,2,5
106506_12 TGGAAACATCCTACACTCAGCT 672,504,168,22,16,6,5
126039_11 TGTAAAAATCCTACACTCAGCT 726,544,182,22,16,6,5
104125_11 TGCAAACATCCTACACTCAGCT 731,536,195,22,16,6,5
166135_10 TGTACACATCCTACACTCAGCT 707,522,185,22,16,6,5
87144_10 AAACATCCTACACTCAGCT 704,521,183,19,14,5,5
135053_8 GTAAACATCCTACACTCAGC 730,585,145,20,16,4,5
103446_7 ATGTAAACATCCTACACTCAGCT 826,608,218,23,17,6,5
126092_6 TGTAAACATCCTACGCTCAGCT 820,608,212,22,16,6,5
176675_4 TGTAAACATCCTACAGTCAGC 776,609,167,21,16,5,5
164807_4 TGTAAANATCCTACACTCAGCT 782,584,198,22,16,6,5
165551_4 TGTAAACGTCCTACACTCAGCT 774,575,199,22,16,6,5
212164_5 NGTAAACATCCTACACTCAGC 496,378,118,21,16,5,5
351165_3 TGTAAACATCCTAAACTCAGC 765,606,159,21,16,5,5
554443_3 TGTAACCATCCTACACTCAGCT 756,570,186,22,16,6,5
558791_2 CTGTAAACATCCTACCCTCTCAGCT 841,827,14,25,24,1,5
215629_3 GGTAAACATCCTACACTCAGCT 733,550,183,22,16,6,5
397687_3 TGTAAACCTCCTACACTCAGC 682,526,156,21,16,5,5
211908_3 TGTAAACAGCCTACACTCAGCT 619,488,131,22,17,5,5
1847155_3 TGTCAACATCCTACACTCAGCT 613,462,151,22,16,6,5
371212_2 TGTAAACATCCTACACNCAGCT 799,617,182,22,16,6,5
349504_2 TGTAAACATCCTACAATCAGC 778,605,173,21,16,5,5
339275_2 TAAACATCCTACACTCAGCT 794,594,200,20,15,5,5
274318_2 TGTAAACATCCTACANTCAGC 716,576,140,21,16,5,5
332130_2 AACATCCTACACTCAGCT 699,506,193,18,13,5,5
957405_1 ATTGTAAACATCCTACACTCTCAGCT 1022,982,40,26,25,1,5
285229_2 TTAAACATCCTACACTCAGCT 654,481,173,21,15,6,5
335659_2 TGTAAACATCCTACCCTCAGC 601,469,132,21,16,5,5
416247_2 TGTAAAGATCCTACACTCAGCT 581,419,162,22,16,6,5
1213034_1 CTGTAAACATCCTACACTCTCCGCT 848,825,23,25,24,1,5
357412_2 ATCCTACACTCAGCT 593,394,199,15,10,5,5
1870862_1 TGTAAACATCCTACACTCAGCTGTAG 1036,717,319,26,18,8,5
2047899_1 TGTAAACATCCTACACTCANCT 818,663,155,22,17,5,5
1239997_1 CTGTAAACATCTTACACTCTCAGCT 668,658,10,25,24,1,5
1775911_1 TGTAAACANCCTACACTCAGCT 788,631,157,22,17,5,5
1357161_1 TGAAAACATCCTACACTCAGCT 838,621,217,22,16,6,5
1938755_1 TGTAAGCATCCTACACTCAGCT 821,609,212,22,16,6,5
972587_1 ATGTAAACATCCTACTCTCAGCT 822,592,230,23,16,7,5
1816941_1 TGTAATCATCCTACACTCAGCT 802,590,212,22,16,6,5
419049_1 TGTAAACATGCTACACTCAGCT 781,578,203,22,16,6,5
550521_1 TCTAAACATCCTACACTCAGC 736,577,159,21,16,5,5
861263_1 GTAAACATCCTACACGCAGCT 773,572,201,21,15,6,5
1855686_1 TGTAAACATCCTACACTGAGCT 763,561,202,22,16,6,5
895820_1 TGTAAACACCCTACACTCACCT 623,553,70,22,19,3,5
1071881_1 TGTAAACATCGTACACTCAGCT 696,499,197,22,16,6,5
1833195_1 TGCAAACATCCTACACTCAGC 618,496,122,21,16,5,5
1896738_1 TGTAAACAGCCTACACTCAGC 577,492,85,21,17,4,5
1852025_1 TGTAAACATCCTATACTCAG 602,485,117,20,16,4,5
483932_1 ACATCCTACACTCAGCT 679,479,200,17,12,5,5
1993032_1 GGTAAACATCCTACACTCAGC 541,440,101,21,16,5,5
1891859_1 GTAAAAATCCTACACTCAGCT 609,437,172,21,15,6,5
539386_1 CATCCTACACTCAGCT 605,421,184,16,11,5,5
1499026_1 NGTAAACATCCTACACTCAG 502,412,90,20,16,4,5
507151_1 TGTAAACTTCCTACACTCAGCT 545,406,139,22,16,6,5
1608878_1 TGGAAACATCCTACACTCAGCTA 539,397,142,23,16,7,5
852663_1 NTAAACATCCTACACTCAGCT 537,383,154,21,15,6,5
1943796_1 TATAAACATCCTACACTCAGCT 464,353,111,22,16,6,5
1614897_1 TGTAAACATCCTCCACTCAGC 136,126,10,21,16,5,5
31030_35 CTGGGAGAGGGTTGTTTACTCC 819,781,38,22,21,1,3
58691_15 CTGGGAGAGGGTTGTTTACTC 791,753,38,21,20,1,3
79845_10 TGGGAGAGGGTTGTTTACTCC 818,778,40,21,20,1,3
91037_9 CTGGGAGAGGGTTGTTTACT 752,714,38,20,19,1,3
221800_3 CTGGGAGAGGGTTGTTTACTCCT 877,838,39,23,22,1,3
780148_2 TGGGAGAGGGTTGTTTACTC 788,748,40,20,19,1,3
288959_2 CTGGGAGAGGGTTGTTTAC 687,653,34,19,18,1,3
1440177_1 TGGGAGAGGGTTGTTTACTCCT 826,788,38,22,21,1,3
1663485_1 ATGAGTTGGCTGGGAAC 535,510,25,17,15,2,3
949687_1 NTGGGAGAGGGTTGTTTACTCC 492,486,6,22,21,1,3
cluster#=4 referenceSeqID=bta-mir-103-1 reads#=24 mir#=25
bta-mir-103-1 ctgccctcggcttctttacagtgctgccttgttgcatatggatcaAGCAGCATTGTACAGGGCTATGAaggc
bta-mir-103-2 gtgctttcagcttctttacagtgctgccttgtagcattcaggtcaAGCAGCATTGTACAGGGCTATGAaaga
bta-mir-107 ctgctttcagcttctttacagtgttgccttgtggcatggagttcaAGCAGCATTGTACAGGGCTATCaaagc
hsa-mir-103a-1 ctgccctcggcttctttacagtgctgccttgttgcatatggatcaAGCAGCATTGTACAGGGCTATGAaggc
hsa-mir-103a-2 gtgctttcAGCTTCTTTACAGTGCTGCCTTGtagcattcaggtcaAGCAGCATTGTACAGGGCTATGAaaga
ssc-mir-103-1 ctgccctcggcttctttacagtgctgccttgttgcatatggatcaAGCAGCATTGTACAGGGCTATGAaggc
ssc-mir-103-2 gtgctttcagcttctttacagtgctgccttgtagcattcaggtcaAGCAGCATTGTACAGGGCTATGAaaga
ssc-mir-107 ctgctttcagcttctttacagtgttgccttgtggcatggagttcaAGCAGCATTGTACAGGGCTATCAaagc
cfa-mir-103-1 ------tcggcttctttacagtgctgccttgttgcatatggatcaAGCAGCATTGTACAGGGCTATGA----
cfa-mir-103-2 gtgctttcagcttctttacagtgctgccttgtagcattcaggtcaAGCAGCATTGTACAGGGCTATGAaaga
cfa-mir-107 --------agcttctttacagtgttgccttgtggcatggagttcaAGCAGCATTGTACAGGGCTAT------
mdo-mir-103-1 ttgtcttcggcttctttacagtgctgccttgttgcatatggatcaAGCAGCATTGTACAGGGCTATGAagac
mdo-mir-103-2 gtgctttcagcttctttacagtgctgccttgttgcattgatgtcaAGCAGCATTGTACAGGGCTATGAaaga
mdo-mir-107 ctgctttcggcttctctacagtgttgccttgtggcgtggagttcaAGCAGCATTGTACAGGGCTATCAaagc
ptr-mir-103-1 ctgccctcggcttctttacagtgctgccttgttgcatatggatcaAGCAGCATTGTACAGGGCTATGAaggc
ptr-mir-103-2 gtgctttcagcttctttacagtgctgccttgtagcattcaggtcaAGCAGCATTGTACAGGGCTATGAaaga
oan-mir-103-1 ttgccctcggcttctttacagtgctgccttgttgcatatggatcaAGCAGCATTGTACAGGGCTATGAgggc
oan-mir-103-2 GTGCTTTCagcttctttacagtgctgccttgttgcattcatgtcaAGCAGCATTGTACAGGGCTATGAaaga
oan-mir-107 ttgctttcAGCTTCTTTACAGTGTTGCCTtgtggcatggagttcaAGCAGCATTGTACAGGGCTATCaaagc
mmu-mir-103-1 ctgccctcGGCTTCTTTACAGTGCTGCCTTGttgcatatggatcaAGCAGCATTGTACAGGGCTATGAaggc
mmu-mir-103-2 gtgctttcAGCTTCTTTACAGTGCTGCCTTGtagcattcaggtcaAGCAGCATTGTACAGGGCTATGAaaga
mmu-mir-107 gtgctttcAGCTTCTTTACAGTGTTGCCTTGtggcatggagttcaAGCAGCATTGTACAGGGCTATCAaagc
rno-mir-107 ctgctttaAGCTTCTTTACAGTGTTGCCTTGTggcatggagttcaAGCAGCATTGTACAGGGCTATCAaagc
eca-mir-107a ctgccctcggcttctttacagtgctgccttgttgcggatggatcaAGCAGCATTGTACAGGGCTATGA----
eca-mir-103 gtgctttcagcttctttacagtgctgccttgtagcattcaggtcaAGCAGCATTGTACAGGGCTATGAaaga
63767_15 AGCTTCTTTACAGTGTTGCCTTGT 924,957,-33,24,23,1,5
144086_5 AGCTTCTTTACAGTGTTGCCTTG 881,914,-33,23,22,1,5
370224_2 AGCTTCTTTACAGTGTTGCCTT 835,868,-33,22,21,1,5
281093_2 AGCTTCTTTACAGTGTTGCCT 737,770,-33,21,20,1,5
cluster#=5 referenceSeqID=hsa-mir-320b-1 reads#=2 mir#=21
hsa-mir-320b-1 aattaatccctctctttctagttcttcctagagtgaggAAAAGCTGGGTTGAGAGGGCAAacaaattaactaattaatt
hsa-mir-320c-1 aatgaggccttctcttcccagttcttcccagagtcaggAAAAGCTGGGTTGAGAGGGTagaaaaaaaatgatgtagg--
hsa-mir-320c-2 --------cttctctttccagttcttcccagaattgggAAAAGCTGGGTTGAGAGGGT---------------------
hsa-mir-320d-2 ---------ttctcttcccagttcttcttggagtcaggAAAAGCTGGGTTGAGAGGA----------------------
hsa-mir-320e ------gccttctcttcccagttcttcctggagtggggaAAAGCTGGGTTGAGAAGGt---------------------
hsa-mir-320b-2 tcttaggctttctcttcccagat-ttcccaaagttgggAAAAGCTGGGTTGAGAGGGCAAaaggaaaaaaaaagaattc
hsa-mir-320d-1 ---------ttctcgtcccagttcttcccaaagttgagAAAAGCTGGGTTGAGAGGA----------------------
ptr-mir-320b-1 aattaatccctctctttctagttcttcctagagtgaggAAAAGCTGGGTTGAGAGGgcaaacaaattaactaattaat-
ptr-mir-320c-1 aatgaggccttctcttcccagttcttcccagagtcaggAAAAGCTGGGTTGAGAGGGTagaaaaaaaatgatgtagg--
ptr-mir-320c-2 ---------ttctctttccagttcttcccagaattgggAAAAGCTGGGTTGAGAGGGT---------------------
ptr-mir-320a ctctccgccttctcttcccggttcttcccggagtcgggAAAAGCTGGGTTGAGAGGgcgaaaaaggatgagg-------
ptr-mir-320d-3 ---------ttctcttcccagttcttcttggagtcaggAAAAGCTGGGTTGAGAGG-----------------------
ptr-mir-320d-2 ----------tctcttcctggttcttcccgaagtcaggAAAAGCTGGGTTGAGAGGa----------------------
ptr-mir-320b-2 tcttaggctttctcttcccagat-ttcccaaagttgggAAAAGCTGGGTTGAGAGGgcaaaaggaaaaaaaaagaattc
ptr-mir-320d-1 ---------ttctcgtcccagttcttcccaaagttgagAAAAGCTGGGTTGAGAGG-----------------------
ppy-mir-320b-1 aattaatccctctctttctagttcttcctagagtaaggAAAAGCTGGGTTGAGAGGGCAAacaaattaactaattaatt
ppy-mir-320c-1 aatgaggccttctcttcccacttcttcccagagtcaggAAAAGCTGGGTTGAGAGGGTagaaaaaaaatgatgta----
ppy-mir-320d-2 ---------ttctcttcccagttcttcttggagtcaggAAAAGCTGGGTTGAGAGGA----------------------
ppy-mir-320c-2 --------cttctctttccagttctttccagaattgggAAAAGCTGGGTTGAGAGGGT---------------------
ppy-mir-320d-1 ---------ttctcttcccagttcttcccaaagttgagAAAAGCTGGGTTGAGAGGA----------------------
ppy-mir-320b-2 tcttaggctttctcttctcagtt-ttcccaaagttgagAAAAGCTGGGTTGAGAGGGCAAaaggaaaaaaaaagaattc
352174_2 AAAAGCTGGGTTGAGCGGA 627,603,24,19,18,1,3
cluster#=6 referenceSeqID=bta-mir-450-1 reads#=295 mir#=18
bta-mir-450-1 actatTTTTGCGATGTGTTCCTAATATgcagtataaatatattgggagcattttgcatgcatggttttgtatcaatatacag
bta-mir-450 actatTTTTGCGATGTGTTCCTAATATgtaatctaaatgtattgggaacattttgcattcatagttttgtatcaat------
hsa-mir-450a-1 actgtTTTTGCGATGTGTTCCTAATATgcactataaatatattgggaacattttgcatgtatagttttgtatcaatata---
hsa-mir-450a-2 actatTTTTGCGATGTGTTCCTAATATgtaatataaatgtattggggacattttgcattcatagttttgtatcaataatatg
ssc-mir-450a actggTTTTGCGATGTGTTCCTAATATgcagtataaatatattgggagcattttgcatgcatggttttgtatcactatacag
ssc-mir-450c actatTTTTGCGATGTGTTCCTAATACgtaatctaagtgtATTGGGAACATTTTGCATTCGTagttttgtgtc---------
cfa-mir-450a actgTTTTTGCGATGTGTTCCTAATAtgcagtatgaacatattgggagcattttgcatgcatggttttgtatcaatata---
mml-mir-450a-1 actgtTTTTGCGATGTGTTCCTAATATgtactataaatatattgggaacattttgcatgtgtagttttgtatcaatata---
mml-mir-450a-2 actatTTTTGCGATGTGTTCCTAATATgtaatataaatgtattggggacattttgcattcatagttttgtatcaataatatg
ptr-mir-450a-1 actgtTTTTGCGATGTGTTCCTAATATgcactataaatatattgggaacattttgcatgtatagttttgtatcaatat----
ptr-mir-450a-2 actatTTTTGCGATGTGTTCCTAATATgtaatataaatgtattggggacattttgcattcatagttttgtatcaataatatg
ppy-mir-450a-1 actgtTTTTGCGATGTGTTCCTAATAtgcacaataaatatattgggaacattttgcatgtatagtttggtatcaatata---
ppy-mir-450a-2 actatTTTTGCGATGTGTTCCTAATAcgtaatataaatgtattggggacattttgcattcatagttttgtatcaatgatatg
mmu-mir-450a-1 gctgtTTTTGCGATGTGTTCCTAATATgtgctataattatATTGGGAACATTTTGCATAAATagctttgtgtcaataca---
mmu-mir-450a-2 actatTTTTGCGATGTGTTCCTAATATgtactatgagtatATTGGGGATGCTTTGCATTCATggttc---------------
rno-mir-450a gctgtTTTTGCGATGTGTTCCTAATGTgtgctacaattaTATTGGGAACATTTTGCATAAatagttttacatcgacaca---
eca-mir-450a actgtTTTTGCGATGTGTTCCTAATATgcagtataaatatattgggagcattttgcatgcatggttttgtatcaatata---
eca-mir-451a actatTTTTGCGATGTGTTCCTAATACgtaatataaatgtattgggaacattttgcattcatagttttgtatcaata-----
1206982_1 TTTTGCGATGTGTTCCTAATATGTAAT 1055,1022,33,27,26,1,5
8790_155 ATTGGGAACATTTTGCATTCAT 822,787,35,22,21,1,3
20316_57 TTGGGAACATTTTGCATTCAT 791,754,37,21,20,1,3
31282_35 ATTGGGAACATTTTGCATTCA 800,762,38,21,20,1,3
45197_21 ATTGGGAACATTTTGCATTC 758,719,39,20,19,1,3
147435_5 TATTGGGAACATTTTGCATTC 759,792,-33,21,20,1,3
128486_5 ATTGGGAACATTTTGCATT 751,711,40,19,18,1,3
213885_4 TATTGGGAACATTTTGCATTCA 810,843,-33,22,21,1,3
497968_2 ATTGGGAACCTTTTGCATTCA 736,725,11,21,20,1,3
1081102_2 ATTGGGAACCTTTTGCATTCAT 677,660,17,22,21,1,3
1664753_1 ATTGGGAACATTTTGCATTCATA 826,795,31,23,22,1,3
1326573_1 TTGGGAACATTTTGCTTTCAT 764,756,8,21,20,1,3
1109743_1 ATTGGGAACATTTTGTATTCAT 735,728,7,22,21,1,3
1217343_1 TTGGGAACATTTTGCATTCNT 707,701,6,21,20,1,3
1661650_1 ATTGGGAACATTTTGCCTTCAT 658,639,19,22,21,1,3
1644059_1 TTGGGAACATTTTGCATTCATA 624,591,33,22,21,1,3
1099125_1 NTTGGGAACATTTTGCATTCAT 566,558,8,22,21,1,3
755640_1 TATTGGGAACCTTTTGCATTCA 543,536,7,22,21,1,3
cluster#=7 referenceSeqID=bta-mir-181a-2 reads#=843 mir#=24
bta-mir-181a-2 tgccagggccaggacccagtcttcagaggactccaaggAACATTCAACGCTGTCGGTGAGTTtgggatttgaaaaaaccaccgaccgttgactgtaccttgggttcctta
bta-mir-181a-1 ---------------tgagctccgaggttgcttcagtgAACATTCAACGCTGTCGGTGAGTTtggaattaaaaaaaaccatcgaccgttgattgtaccctatggccaacc
hsa-mir-181a-2 agaagggctatcaggccagccttcagaggactccaaggAACATTCAACGCTGTCGGTGAGTttgggatttgaaaaaACCACTGACCGTTGACTGTACCttggggtcctta
hsa-mir-181a-1 ---------------tgagttttgaggttgcttcagtgAACATTCAACGCTGTCGGTGAGTttggaattaaaaaaaACCATCGACCGTTGATTGTACCctatggctaacc
ssc-mir-181a-2 -----------------------------actccaaggAACATTCAACGCTGTCGGTGAGTTtgggatttgaaaaaaccaccgaccgttgactgtaccttggggttctt-
ssc-mir-181a-1 ----------------gagtttagaggttgcttcagtgAACATTCAACGCTGTCGGTGAGTTtggaattcaaaaaaaccatcgaccgttgattgtaccctatggccaacc
cfa-mir-181a-2 --------------------------------------AACATTCAACGCTGTCGGTGAGtttgggatttgaaaaaaccaccgaccgttgactgtacc------------
cfa-mir-181a-1 --------------------------------------AACATTCAACGCTGTCGGTGAGtttggaattaaaaaaaaccatcgaccgttgattgtacc------------
mdo-mir-181a ------------------------------------tgAACATTCAACGCTGTCGGTGAGTttggaattaaaaaaaaccatcgaccgttgattgtacc------------
mdo-mir-181c --------------------------------tgggggAACATTCAACGCTGTCGGTGAGTttggcagctgaacaaaccatcgaccgttgagtggaccccg---------
sla-mir-181a-2 agaagggctaccaggccaaccttcagaggactccaaggAACATTCAACGCTGTCGGTGAGTttgggacttgaaaaaaccactgaccgttgactgtaccttggggtcctta
mml-mir-181a-2 agaagggctatcaggccagccttcagaggactccaaggAACATTCAACGCTGTCGGTGAGTttgggatttgaaaaaaccactgaccgttgactgtacctcggggtcctta
mml-mir-181a-1 ---------------tgagttttgaggttgcttcagtgAACATTCAACGCTGTCGGTGAGTttggaattaaaaaaaACCATCGACCGTTGATTGTACCctatggctaacc
mne-mir-181a-2 agaagggctatcaggccagccttcagaggactccaaggAACATTCAACGCTGTCGGTGAGTttgggatttgaaaaaaccactgaccgttgactgtacctcggggtcccca
mne-mir-181a-1 ---------------tgagttttgaggttgcttcagtgAACATTCAACGCTGTCGGTGAGTttggaattaaaaaaaACCATCGACCGTTGATTGTACCctatggctaacc
ggo-mir-181a-2 agaagggctatcaggccaggcttcagaggactccaaggAACATTCAACGCTGTCGGTGAGTttgggatttgaaaaaaccactgaccgttgactgtaccttggggtcctta
ggo-mir-181a-1 ---------------tgagttttgaggttgcttcagtgAACATTCAACGCTGTCGGTGAGTttggaattaaaaaaaACCATCGACCGTTGATTGTACCctatggctaacc
oan-mir-181a ---------gaattctgcttcgaatggttgcttcagtgAACATTCAACGCTGTCGGTGAGTttggaattagtagaaACCATCGACCGTTGATTGTACCctgcggcaacca
mmu-mir-181a-2 --------------------------------ccatggAACATTCAACGCTGTCGGTGAGTttgggattcaaaaaaaccACCGACCGTTGACTGTACCTTGg--------
mmu-mir-181a-1 -------------------------ggttgcttcagtgAACATTCAACGCTGTCGGTGAGTttggaattcaaaaaaaCCATCGACCGTTGATTGTACCctatagctaacc
rno-mir-181a-2 agatgggcaaccaaggcagccttaagaggactccatggAACATTCAACGCTGTCGGTGAGTttgggattaaaaaaaaCCACCAACCGTTGACTGTaccttgggattctta
rno-mir-181a-1 ------------------------aggttgcttcagtgAACATTCAACGCTGTCGGTGAGTttggaattcaaaaaaaCCATCGACCGTTGATTGTACCctatagctaacc
eca-mir-181a aagggctgccaggacccagccttcagaggactccaaggAACATTCAACGCTGTCGGTGAGTttgggatttgaaaaaaccaccgaccgttgactgtaccttggggtcctta
eca-mir-181a-2 ---------------tgagtctgagggttgcttcagtgAACATTCAACGCTGTCGGTGAGTttggaattaaaaaaaaccatcgaccgttgattgtgccctgtggctagcc
2267_706 ACCATCGACCGTTGATTGTACC 822,785,37,22,21,1,3
16515_76 ACCATCGACCGTTGATTGTAC 781,744,37,21,20,1,3
70127_12 AACCATCGACCGTTGATTGTACC 868,834,34,23,22,1,3
104887_9 ACCATCGACCGTTGATTGTA 740,703,37,20,19,1,3
114025_7 ACCATCGACCGTTGATTGT 712,676,36,19,18,1,3
199388_3 AACCATCGACCGTTGATTGTAC 840,807,33,22,21,1,3
227346_3 ACCATCGACCGTTGAATGTACC 798,781,17,22,21,1,3
232553_3 AACCATCGACCGTTGATTGT 750,721,29,20,19,1,3
360008_2 AAACCATCGACCGTTGATTGTACC 950,911,39,24,23,1,3
238937_2 AAACCATCGACCGTTGATTGT 789,753,36,21,20,1,3
238543_2 CCATCGACCGTTGATTGTACC 788,749,39,21,20,1,3
814582_1 ACCATCNACCGTTGATTGTACC 796,789,7,22,21,1,3
1674635_1 AACCATCGACCGTTGGTTGTACC 798,786,12,23,22,1,3
1104305_1 ACCATCGATCGTTGATTGTACC 748,725,23,22,21,1,3
564770_1 ACCATCGACCGTTGANTGTACC 722,716,6,22,21,1,3
1424501_1 GCCATCGACCGTTGATTGTACC 726,707,19,22,21,1,3
595959_1 ACCATCGACCGTTGANTGTAC 700,693,7,21,20,1,3
1954697_1 ACCATCGACCGTTGAATGTAC 695,688,7,21,20,1,3
669568_1 ACCATCGACCGTTGATTGGACC 652,637,15,22,21,1,3
1430191_1 AAACCATCGACCGTTGATTGTA 634,618,16,22,21,1,3
1327177_1 ACCATCGACCGTTGCTTGTACC 627,618,9,22,21,1,3
1554745_1 ACCATCGACCGTTGATTGTCCC 619,609,10,22,21,1,3
2033397_1 CCCACTGACCGTTGACTGTAC 620,608,12,21,20,1,3
1236235_1 AAACCATCGACCGTTGNTTGT 607,603,4,21,20,1,3
1660554_1 AACCCCTGACCGTTGACTGTAC 611,601,10,22,21,1,3
1148331_1 ACCATCGACCGTTGATTGTAAC 576,569,7,22,21,1,3
1019626_1 ACCATCGACCGTTGATTGCACC 576,563,13,22,21,1,3
680441_1 NCCATCGACCGTTGATTGTACC 502,495,7,22,21,1,3
2040937_1 ACCATCGCCCGTTGATTGTACC 495,474,21,22,21,1,3
cluster#=8 referenceSeqID=bta-mir-378 reads#=3746 mir#=16
bta-mir-378 agggctcctgactccaggtcctgtgtgttacctcgaaatagcACTGGACTTGGAGTCAGAAGGCct
bta-mir-378-2 -----------------------------------ggagagcACTGGACTTGGAGTCAGAAGGCtg
hsa-mir-422a ---------------------------------gagagaagcACTGGACTTAGGGTCAGAAGGCct
hsa-mir-378d-2 ---------------------gaatggttacaaggagagaacACTGGACTTGGAGTCAGAAAactt
hsa-mir-378b ---------ggtcattgagtcttcaaggctagtggaaagagcACTGGACTTGGAGGCAGAAagacc
hsa-mir-378i ------------------------------------gggagcACTGGACTAGGAGTCAGAAGGtgg
hsa-mir-378f tggactcccatagttttcaggctgctaaacaacagaacgagcACTGGACTTGGAGCCAGAAGtctt
hsa-mir-378g -----------------------------------------cACTGGGCTTGGAGTCAGAAGacct
hsa-mir-378c --------------------------------ggaggccatcACTGGACTTGGAGTCAGAAGAGTG
hsa-mir-378e aggccaggggcagacagtggacagagaacagtgcccaagaccACTGGACTTGGAGTCAGGAcat--
hsa-mir-378d-1 ------------actgtttctgtccttgttcttgttgttattACTGGACTTGGAGTCAGAAAcagg
ssc-mir-378-1 agggctcctgactccaggtcctgtgtgttgcctggaaatagcACTGGACTTGGAGTCAGAAGGCct
ssc-mir-378-2 tgggcctcctgaaggcaggcagaaccattgggtgaaaagagcACTGGACTTGGAGTCAGAAGGCcc
ptr-mir-422a ---------------------------------gagagaagcACTGGACTTAGGGTCAGAAGGCct
ppy-mir-378 agggctcctgactccaggtcctgtgtgttacctagaaatagcACTGGACTTGGA-TCAGAAGGC--
mmu-mir-378b gcagtaccctcaggaggcaggtacgatggatagagagggaaccCTGGACTTGGAGTCAGAAGAcct
1968_875 ACTGGACTTGGAGTCCGAAGGCT 806,788,18,23,22,1,3
2683_576 ACTGGACTTGGAGTCTGAAGGCT 830,814,16,23,22,1,3
9062_254 ACTGGACTTGGAGTCAGCAGGCT 762,744,18,23,22,1,3
6383_225 ACTGGACTTGGAGTCGGAAGGCT 840,817,23,23,22,1,3
10694_221 ACTGGACTTGGAGTCAGACGGCT 746,727,19,23,22,1,3
9475_204 ACTGGACTTGGAGCCAGAAGGCT 741,726,15,23,22,1,3
9761_185 ACTGGACTTGGCGTCAGAAGGCT 740,724,16,23,22,1,3
16001_126 ACTGGACTTGGAGTAAGAAGGCT 745,729,16,23,22,1,3
16478_116 ACTGGAATTGGAGTCAGAAGGCT 739,722,17,23,22,1,3
12849_111 ACTGGACTTGGAGTCCGAAGA 748,728,20,21,20,1,3
15624_79 ACTGGACTTGGAGTCAGAAAA 803,765,38,21,20,1,3
21947_55 GCTGGACTTGGAGTCAGAAGGCT 785,761,24,23,22,1,3
22440_52 ACTGGACTTGGAGTCTGAAGA 758,743,15,21,20,1,3
23786_49 CTGGACTTGGAGTCACAAGGCT 781,760,21,22,21,1,3
26659_43 CTGGACTTGGAGTCATAAGGCT 778,763,15,22,21,1,3
33310_44 AATGGACTTGGAGTCAGAAGGCT 755,735,20,23,22,1,3
20449_58 ACTGGACTTGGATCAGAAGGC 800,537,263,21,14,7,3
36081_38 ACTGGACTTGCAGTCAGAAGGCT 765,744,21,23,22,1,3
49578_26 ACTGGACTTGGAGTCAGAAGCCT 791,771,20,23,22,1,3
42271_27 TCTGGACTTGGAGTCAGAAGGCT 709,685,24,23,22,1,3
47344_25 CTGGACTTGGAGTCAGCAGGCT 704,686,18,22,21,1,3
49357_21 ACCGGACTTGGAGTCAGAAGGCT 831,807,24,23,22,1,3
52030_23 ACTGGACTTGGAGTCAGCAGA 679,661,18,21,20,1,3
52350_18 CTGGACCTGGAGTCAGAAGGCT 785,767,18,22,21,1,3
111891_19 ACTGGACTTGGAGTCAGACGA 695,678,17,21,20,1,3
60973_17 AGTGGACTTGGAGTCAGAAGGCT 734,717,17,23,22,1,3
59460_15 ACTGGACTTGGAGTCGGAAGA 764,745,19,21,20,1,3
64635_13 ACTGGACTTGGAGTCAGAAGAG 839,802,37,22,21,1,3
95116_14 CTGGACTTGGAGTCAGACGGCT 707,686,21,22,21,1,3
86959_9 ACTGGACTTGGAGTCAGAAGGCTG 925,887,38,24,23,1,3
98975_11 ACTGGACTTGGAGTAAGAAGA 674,651,23,21,20,1,3
142930_11 ACTGGACTTGGAGCCAGAAGTC 651,617,34,22,21,1,3
96946_9 ACGGGACTTGGAGTCAGAAGGCT 761,742,19,23,22,1,3
101103_8 CTGGACTTGGACTCAGAAGGCT 767,744,23,22,21,1,3
96963_10 CTGGACTTGGAGTAAGAAGGCT 608,588,20,22,21,1,3
110703_7 ACTGGACTTGGAGTCAGAAGAGT 863,825,38,23,22,1,3
173476_9 ACTGGCCTTGGAGTCAGAAGA 627,610,17,21,20,1,3
119813_7 GCTGGACTTGGAGTCAGAAGA 725,703,22,21,20,1,3
120188_6 ACTGGGCTTGGAGTCAGAAGA 779,741,38,21,20,1,3
137057_7 ACTGGACTTGGAGTCACAAGA 647,632,15,21,20,1,3
261356_6 ACTGGAATTGGAGTCAGAAGA 751,727,24,21,20,1,3
140229_5 ACTGGACTTGGAGTCAGAAAGCT 808,790,18,23,22,1,3
226224_5 ACTGGACTGGGAGTCAGAAGGCT 756,737,19,23,22,1,3
107806_7 ACTGGACTTGGATCAGAAGG 734,515,219,20,14,6,3
173580_5 TCTGGACTTGGAGTCAGAAGA 625,605,20,21,20,1,3
165590_4 CTGGACTTGGAGTCAGAAAA 789,750,39,20,19,1,3
682060_5 ACTGGACTTGGACCCAGAAGGC 617,595,22,22,20,2,3
159233_4 ACTGGACTTGGAGTCTGAAA 724,706,18,20,19,1,3
193009_3 ACTGGACTTGGAGGCAGAAGA 664,649,15,21,20,1,3
266601_2 CACTGGACTTGGAGTAAGAAGGCT 900,880,20,24,23,1,3
339165_2 CTGGACTTGGAGTCAGAAGGCTG 914,874,40,23,22,1,3
1355701_2 CACTGGACTTGGAGCCAGAAGGCT 830,812,18,24,23,1,3
714061_3 ACTGGACTTGGACCCAGAAGG 549,528,21,21,19,2,3
270194_2 ACTGGACTTAGAGTCAGAAGA 734,714,20,21,20,1,3
376780_2 ACTGGACTTGGAGTCCGAAA 717,695,22,20,19,1,3
1172205_2 ACTGGACCTGGAGTCAGAAGCA 603,580,23,22,20,2,3
1570193_2 ACTGGACTTGGATCAGAAG 746,508,238,19,13,6,3
381206_2 CTGGACTTGGATCAGAAGGC 727,482,245,20,13,7,3
501238_2 ACTGGAATTGGAGCCAGAAGG 443,422,21,21,19,2,3
1438954_1 ACTGGACTAGGAGTCAGAAGGT 872,832,40,22,21,1,3
667102_1 ACTGGACTTGGAGCCAGAAGTCT 837,801,36,23,22,1,3
543712_1 TCACTGGACTTGGAGTCAGAAGA 837,799,38,23,22,1,3
1401939_1 CTGGACTTGGAGTCAGAAGAG 837,797,40,21,20,1,3
1511278_1 GATCACTGGACTTGGAGTCAGACGGC 798,776,22,26,24,2,3
990801_1 TGGACTGGGAGTCAGAAGGCT 791,772,19,21,20,1,3
1665801_1 ACTGGACTTGGAGTCAAAAGA 783,765,18,21,20,1,3
717994_1 CACTGGACTTGGAGTCAGACGGCT 781,763,18,24,23,1,3
1376156_1 ACTGGACTTGGAATCAGAAGA 780,762,18,21,20,1,3
1197167_1 ACTGGACTTGGAGTCAGAAGATCG 765,743,22,24,22,2,3
2023333_1 CTGGACCTGGAGTCAGAAGA 734,714,20,20,19,1,3
1153286_1 TGGACTCGGAGTCAGAAGGCT 722,704,18,21,20,1,3
1334531_1 ACTGGACTTGGAGTCGTAAGA 716,695,21,21,19,2,3
1914486_1 CCTGGACTTGGAGTCAGAAGA 712,693,19,21,20,1,3
888122_1 TGGACTTGGAGTCAGCAGGCT 676,653,23,21,20,1,3
925359_1 ATTACTGGACTTGGAG 619,652,-33,16,15,1,3
1751598_1 ACTGGACATGGAGCCAGAAG 672,649,23,20,19,1,3
943982_1 ACTGGACTTGGAGTTAGCAGGCT 663,640,23,23,21,2,3
838817_1 CACTTGACTTGGAGTCAGAAGGCT 653,635,18,24,23,1,3
885320_1 ACTGGACGTGGAGTCAGAAGA 633,614,19,21,20,1,3
974038_1 ACTGGACTTGGAGTAAGAAAA 623,608,15,21,20,1,3
1802458_1 CACTGGACTTGGATCAGAAGGC 877,598,279,22,15,7,3
1590976_1 AATGGACTTGGAGTCAAAAGGCT 611,592,19,23,21,2,3
1496757_1 ACTGGACTTGGAGCCCGAAG 608,589,19,20,19,1,3
1851874_1 CTGGACTTGGAGTCAGTGGGCT 597,579,18,22,20,2,3
2002232_1 ACTGGACTTGGAGCCAGAAGACT 568,560,8,23,22,1,3
487998_1 ACTGGACTTAGCGTCAGAAGGC 564,548,16,22,21,1,3
610476_1 CTGGCCTTGGAGTCAGAAGA 555,536,19,20,19,1,3
805330_3 CCTGGACTTGGACTCAGAAGGC 177,173,4,22,20,2,3
743348_1 ACTGGACTTCGAGCCAGAAG 537,518,19,20,19,1,3
1094979_1 ACTGGACTTGGGGCCAGAAGGCT 533,513,20,23,21,2,3
1482688_1 ACTGGACTTGGAGCAAGAAG 526,507,19,20,19,1,3
681348_1 ACTGGAGTTGGAGCCAGAAGCC 511,499,12,22,20,2,3
696458_1 CTGGAATTGGAGCCAGAAGGC 503,484,19,21,19,2,3
2018444_1 ACTGGACTTGGTGCCAGAAG 499,481,18,20,19,1,3
1363116_1 ACTGGACTTGGAGCTAGAAG 481,473,8,20,19,1,3
990757_1 CCTGGACTTGGAGTCAGCAGCC 493,473,20,22,20,2,3
826176_1 ACTGGACTCGGAGCCAGAAG 469,461,8,20,19,1,3
614915_1 ACTGGACTTGGAGGTAGAAGCCA 473,446,27,23,18,5,3
1226343_1 ACTGGACTTGGAGTCAGCAGTCT 466,443,23,23,21,2,3
657846_1 ACTGGACTTGGATCAGCAGGC 575,419,156,21,14,7,3
1282303_1 ACTGGATTTGGAGCCAGAAGGCT 300,284,16,23,21,2,3
1526517_1 NCTGGACTTGGATCAGAAG 469,275,194,19,12,7,3
924545_2 CCTGGAATTGGAGTCAGCAGGC 75,69,6,22,19,3,3
463615_2 CCTGGACTTGGAGCCAGACGGC 44,38,6,22,19,3,3
1245362_1 TACTGGACTTGGCGTCAGAAGGC 74,66,8,23,19,4,3
1136078_1 CTGGACTTGGAGCAAGACGGC 70,64,6,21,18,3,3
783815_1 AGATCACTGGACTTGGAGTCAGAAGGC 54,52,2,27,26,1,3
1179650_1 NTTACTGGACTTGGAGTCAGAAG 46,42,4,23,21,2,3
1414195_1 CCTGGACTTGGGGTCAGAAGGC 44,40,4,22,20,2,3
1153807_1 ATGGACTTGGAGCCAGAAGGC 42,38,4,21,19,2,3
805879_1 CCTGGAATTGGAGTCAGAAGGA 44,38,6,22,19,3,3
1425083_1 TTGGACTTGGAGGCAGAAGGC 42,36,6,21,18,3,3
1848860_1 NGGACTTGGAGGCAGAAGGC 40,34,6,20,17,3,3
cluster#=9 referenceSeqID=bta-mir-92a reads#=7 mir#=18
bta-mir-92a ctttctacacaggttgggatcggttgcaatgctgtgtttctgtatggTATTGCACTTGTCCCGGCCTGTtgagtttgg
bta-mir-92 ---------tgggtggggatttgttgcactgctgtgtttatataaagTATTGCACTTGTCCCGGCCTGTggaaga---
ssc-mir-92a-1 ctttctacacaggttgggatcggttgcaatgctgtgtttctgtatggTATTGCACTTGTCCCGGCCTGTtgagtttgg
ssc-mir-92a-2 tttcatccgtgggtggggatttgttgcattactgtggttgtataaagTATTGCACTTGTCCCGGCCTGTggaagaaa-
cfa-mir-92a-1 ----------aggttgggatcggttgcaatgctgtgtttctgtatggTATTGCACTTGTCCCGGCCTGT---------
cfa-mir-92a-2 ----------gggtggggatttgtggcattactgtgttcctataaagTATTGCACTTGTCCCGGCCTGT---------
mdo-mir-92 ctttctacacaggttgggatcagttgcaatgctgtgtctgtctgtagTATTGCACTTGTCCCGGCCTGttgagtttgg
oan-mir-92a-2 ctttctacgcAGGTTGGGATCAGTTGCAATGCTttgtttgtctatggTATTGCACTTGTCCCGGCCTGTtgaggttgc
oan-mir-92d ctttctatgcAGGTTGGGATCAGTTGCAATGCTttgtttgtctacagTATTGCGCTTGTTCCGGCCTGTtgag-----
oan-mir-92b ctttctatgcaggttgggatcagtggaaatgctgtttgccttt--ggTATTGCACTTGTCCCAGCCTGTtgagattac
oan-mir-92c --ttctatgcaggttgggatcagtggaaatgctgtttgccttt--ggTATTGCACTTGTCCAAGCCTGTtgagat---
oan-mir-92a-1 attcctccatGGGTGGGGATTTGTTGCATTACTgtagctatgtttagTATTGCACTTGTCCCGGCCTGTggagggaag
mmu-mir-92a-1 ctttctacacAGGTTGGGATTTGTCGCAATGCTgtgtttctgtatggTATTGCACTTGTCCCGGCCTGttgagtttgg
mmu-mir-92a-2 attcatccacAGGTGGGGATTGGTGGCATTACtgtgttagtataaagTATTGCACTTGTCCCGGCCTGaggaagaaag
rno-mir-92a-1 ctttctacacAGGTTGGGATTTGTCGCAATGCTgtgtttctgtatagTATTGCACTTGTCCCGGCCTGttgagtttgg
rno-mir-92a-2 attcatccacAGGTGGGGATTAGTGCCATTACtgtgttagtaaaaagTATTGCACTTGTCCCGGCCTGaggaagaaaa
eca-mir-92a --------acaggttgggatcggttgcaatgctgtgtttctgtatggTATTGCACTTGTCCCGGCCTGT---------
eca-mir-92a-2 --tcatccgtgggtggggatttgttgcattactgtgtttatataaagTATTGCACTTGTCCCGGCCTGTggaaga---
1801676_1 TATTGCCCTTGTCCCGGCCTGA 776,758,18,22,21,1,3
547462_1 TATTGCACTTGTCACGGCCTGA 672,657,15,22,21,1,3
1235515_1 TATTGCACTTGTCCACGCCTGT 673,654,19,22,21,1,3
1542530_1 TATTGCACTTGTCCACGCCTGTT 601,590,11,23,22,1,3
1379375_1 TATTGCACTTGTCCGAGCCTGT 596,588,8,22,21,1,3
407657_2 NATTGCACTTGTCCCAGCCTGT 213,209,4,22,21,1,3
cluster#=10 referenceSeqID=bta-mir-26a-2 reads#=29263 mir#=17
bta-mir-26a-2 ggctgtggctggaTTCAAGTAATCCAGGATAGGCTgtttccatctgtgaggcctattcttgattacttgtttctggaggcagct
bta-mir-26a-1 ggccgtggcctcgTTCAAGTAATCCAGGATAGGCTgtgcaggtccaaggggcctattctcggttacttgcacgcggacgcgggc
bta-mir-26b gcccgggacccagTTCAAGTAATTCAGGATAGGTTgtgt---gctgtccagcctgttctccattacttggctcgggggccggtg
hsa-mir-26b --ccgggacccagTTCAAGTAATTCAGGATAGGTtgtgt---gctgtccagCCTGTTCTCCATTACTTGGCTCggggaccgg--
cfa-mir-26a-2 -------------TTCAAGTAATCCAGGATAGGCTgtttccgtctgtgaggcctattcttgattacttgtttc-----------
cfa-mir-26a-1 -------------TTCAAGTAATCCAGGATAGGCTgtgcaggtccaatgggcctattcttggttacttgcacg-----------
cfa-mir-26b -------------TTCAAGTAATTCAGGATAGGTTgtgt---gctgtccagcctgttctccattacttggct------------
mdo-mir-26-1 -------------TTCAAGTAATCCAGGATAGGCtgtgtccagctgcg-ggcctatccttgattgcttgtttctggaggtggc-
mdo-mir-26-3 -------acctggTTCAAGTAATCCAGGATAGGCtggacccatctcatcggcctattctcgactacttgcactcgg--------
mdo-mir-26-2 ---------ccgtTTCAAGTAATCCAGGATAGGCtgttt---tctcttcagcctgttctccattacttggttcgggggcc----
ptr-mir-26a-2 -gctgtggctggaTTCAAGTAATCCAGGATAGGCTgtttccatctgtgaggcctattcttgattacttgtttctggaggcagct
ptr-mir-26a-1 ----gtggcctcgTTCAAGTAATCCAGGATAGGCTgtgcaggtccaatgggcctattcttggttacttgcacggggacgc----
ptr-mir-26b ---cgggacccagTTCAAGTAATTCAGGATAGGTtgtgt---gctgtccagcctgttctccattacttggctcggggaccgg--
mmu-mir-26a-2 ggctgcggctggaTTCAAGTAATCCAGGATAGGCTgtgtccgtccatgaggCCTGTTCTTGATTACTTGTTTCtggaggcagcg
mmu-mir-26a-1 ggccgtggcctcgTTCAAGTAATCCAGGATAGGCTgtgcaggtccaaggggCCTATTCTTGGTTACTTGCACGgggacgcgggc
mmu-mir-26b gcccgggacccagTTCAAGTAATTCAGGATAGGTtg--tggtgctgaccagCCTGTTCTCCATTACTTGGCTCgggggccggtg
rno-mir-26b gcccgggacccagTTCAAGTAATTCAGGATAGGTtg--tggtgctggccagCCTGTTCTCCATTACTTGGCTCgggggccggtg
110_26028 TTCAAGTAATTCAGGATAGGTT 819,783,36,22,21,1,5
942_1876 TTCAAGTAATTCAGGATAGGT 787,748,39,21,20,1,5
7059_228 TTCAAGTAATTCAGGATAGGTTG 861,826,35,23,22,1,5
9494_146 TCAAGTAATTCAGGATAGGTT 768,731,37,21,20,1,5
10549_133 TTCAAGTAATTCAGGCTAGGTT 746,729,17,22,21,1,5
8891_154 NTCAAGTAATTCAGGATAGGTT 466,459,7,22,21,1,5
15412_82 AAGTAATTCAGGATAGGTT 697,659,38,19,18,1,5
23777_47 TTCAAGTAATTCAGGTTAGGTT 767,752,15,22,21,1,5
29620_42 TTCAAGCAATTCAGGATAGGTT 762,744,18,22,21,1,5
27708_40 TTCAAGGAATTCAGGATAGGTT 727,713,14,22,21,1,5
68108_37 TTCAAGTAATTCAGGATCGGTT 688,671,17,22,21,1,5
31654_34 CAAGTAATTCAGGATAGGTT 691,660,31,20,19,1,5
48134_22 TTCAAGTAATTCAGGNTAGGTT 750,743,7,22,21,1,5
64065_15 TTCAAGTAATTCAGGATAGGTTGT 881,844,37,24,23,1,5
64892_16 TTCAAGTAATTCAGGCTAGGT 707,691,16,21,20,1,5
64691_13 TCAAGTAATTCAGGATAGGT 726,690,36,20,19,1,5
71240_12 TTCAAGAAATTCAGGATAGGTT 751,739,12,22,21,1,5
70158_13 TTCAAGTAATTCAGGCTAGG 699,680,19,20,19,1,5
77124_11 TTCAAGTAATTCAGGGTAGGTT 720,709,11,22,21,1,5
86230_11 CTCAAGTAATTCAGGATAGGTT 705,682,23,22,21,1,5
82350_12 TTCAAGTACTTCAGGATAGGTT 632,612,20,22,21,1,5
109203_9 TTCAAGTAATTCCGGATAGGTT 711,697,14,22,21,1,5
118145_8 TTCAAGTAATTAAGGATAGGTT 751,734,17,22,21,1,5
95295_8 TTCAAGCAATTCAGGATAGG 642,628,14,20,19,1,5
127790_7 TTCACGTAATTCAGGATAGGTT 707,691,16,22,21,1,5
114110_6 GTCAAGTAATTCAGGATAGGTT 715,692,23,22,21,1,5
146211_5 TCAAGTAATTCAGGATAGGTTG 818,782,36,22,21,1,5
129920_5 TTCAAGNAATTCAGGATAGGTT 769,762,7,22,21,1,5
177783_5 TTCGAGTAATTCAGGATAGGTT 757,735,22,22,21,1,5
134146_5 AAGTAATTCAGGATAGGT 664,626,38,18,17,1,5
174660_4 TTCAAGGAATTCAGGATAGGT 773,764,9,21,20,1,5
176041_4 TTCAAGTAATTCAGGTTAGGT 729,710,19,21,20,1,5
229217_4 TTCAAGTAATTCAGCATAGGTT 695,684,11,22,21,1,5
217122_4 TTCAAGTCATTCAGGATAGGTT 686,665,21,22,21,1,5
172664_4 TTCAAGTAATTCAGGATAGGGT 665,646,19,22,21,1,5
172544_4 AGTAATTCAGGATAGGTT 677,639,38,18,17,1,5
379152_3 TTCAAGTAATTCAGGATCGG 656,637,19,20,19,1,5
233853_3 GTAATTCAGGATAGGTT 636,598,38,17,16,1,5
107893_7 NTCAAGTAATTCAGGATAGGT 244,240,4,21,20,1,5
137556_5 NTCAAGTAATTCAGGATAGG 331,326,5,20,19,1,5
312333_2 TTCAAGTAATTGAGGATAGGTT 823,802,21,22,21,1,5
205052_3 AATTCAGGATAGGTT 571,533,38,15,14,1,5
335048_2 TTCAAGTAATTCAGGANAGGTT 780,773,7,22,21,1,5
358903_2 TTCAAGTAATTCGGGATAGGTT 790,767,23,22,21,1,5
332959_2 TTCAAGTAATTCAGGATAGNTT 751,745,6,22,21,1,5
293975_2 TTCAAGAAATTCAGGATAGGT 748,742,6,21,20,1,5
266286_2 TTCAAGCAATTCAGGATAGGT 758,738,20,21,20,1,5
275259_2 TTCAAGTAATTCAGGATAGCTT 755,734,21,22,21,1,5
359983_2 TACAAGTAATTCAGGATAGGTT 755,733,22,22,21,1,5
301303_2 TTCAAATAATTCAGGATAGGTT 730,716,14,22,21,1,5
408968_2 TTCAAGTAATTCAGGACAGGTT 717,696,21,22,21,1,5
656270_2 TTCAAGTACTTCAGGATAGGT 691,679,12,21,20,1,5
376285_2 TTCAAGTAATTCAGGTTAGG 698,678,20,20,19,1,5
253167_2 TTCAAGTAATTCAGGNTAGGT 672,666,6,21,20,1,5
1857328_2 TTCAAGTAATTCAGGATACGTT 603,598,5,22,21,1,5
265034_2 TAATTCAGGATAGGTT 612,573,39,16,15,1,5
593034_2 TTCAAGTAATTAAGGATAGG 549,539,10,20,19,1,5
285437_2 NTCAAGTAATTCAGGATAGGTTG 536,529,7,23,22,1,5
530718_1 TTCAAGTAATTCAGGATAGGTTGTGT 1010,972,38,26,25,1,5
858487_1 CTGGTTCAAGTAATCCAGGATAGG 948,909,39,24,23,1,5
247110_2 NAGTAATTCAGGATAGGTT 453,446,7,19,18,1,5
845698_1 TTCAAGCAATTCAGGATAGGTTG 810,803,7,23,22,1,5
855132_1 TTGAAGTAATTCAGGATAGGTT 807,789,18,22,21,1,5
1159685_1 TTCAAGTAATTCAAGATAGGTT 787,769,18,22,21,1,5
433737_1 TTCAAGAAATTCAGGATAGGTTG 770,766,4,23,22,1,5
695898_1 TTCAAGGAATTCAGGATAGG 741,733,8,20,19,1,5
1245175_1 TTCAAGTAATTCAGGGTAGGT 740,723,17,21,20,1,5
1315813_1 CAAGTAATTCAGGATNGGTT 722,715,7,20,19,1,5
1346591_1 TTCAAGNAATTCAGGATAGG 716,708,8,20,19,1,5
538447_1 TTCAAGCAATTCAGGATAG 703,681,22,19,18,1,5
726874_1 CAAGTAATTCCGGATAGGTT 683,665,18,20,19,1,5
1179592_1 CAAGTAATTCAGGATAGGT 681,645,36,19,18,1,5
2011229_1 TTCAAGTAATTCAGGNTAGGTTG 649,642,7,23,22,1,5
1419161_1 TGCAAGTAATTCAGGATAGGT 658,635,23,21,20,1,5
836328_1 TTCAAGTAATTCAGGACAGG 648,631,17,20,19,1,5
680136_1 TCAAGAAATTCAGGATAGGTT 635,622,13,21,20,1,5
637377_1 TTCAAGTAAATCAGGATAGGTT 615,607,8,22,21,1,5
528485_1 TTCAAGTAATTCAGCATAGCTT 625,606,19,22,20,2,5
1322397_1 TTCAAGTAATTCAGAATAGGT 605,597,8,21,20,1,5
1309501_1 TTCAAGTAATTCAGTATAGG 607,595,12,20,19,1,5
795106_1 TCAAGTAATTCCGGATAGGTT 598,589,9,21,20,1,5
1207130_1 TTCCAGTAATTCAGGATAGGTT 600,582,18,22,21,1,5
1447448_1 TTCAAGTAATTCAGGTGAGGT 564,553,11,21,19,2,5
1188128_1 AAGGAATTCAGGATAGGTT 517,505,12,19,18,1,5
516176_1 TTCAAGTATTTCAGGATAGG 459,448,11,20,19,1,5
14215_89 CCTGTTCTCCATTACTTGGCTC 843,804,39,22,21,1,3
34718_30 CCTGTTCTCCATTACTTGGCT 807,769,38,21,20,1,3
259655_3 CCTGTTCTCCATTACTTGGC 795,755,40,20,19,1,3
1433998_1 CCTGTTCTCCATTACATGGCTC 735,725,10,22,21,1,3
724606_1 CCTGTTCTCCCTTACTTGGCTC 678,667,11,22,21,1,3
1103940_1 CCTGTTCCCCATTACTTGGCT 659,647,12,21,20,1,3
1542323_1 CCTGTTCTCCATTACTTGGCTCG 479,477,2,23,22,1,3
cluster#=11 referenceSeqID=oar-mir-329a reads#=3 mir#=13
oar-mir-329a tgtaattggtggtacttgaggaGAGGTTTTCTAGGTCTCCGTTTctttcatgaggatgaAACACACCTGGTTAACCTTTTTtccagtatcagatcccaccttgg
oar-mir-329b gttcacccatggtacctgaagaGAGGTTTTCTGGGTTTCTGTTTCtttaatgaggatgaAACACACCTGGTTAACCTCTTTtccagtatcaaatcccatcttga
bta-mir-329a --------gtggtacttgaggagaggttttctaggtctctgtttctttcatgaggatgaAACACACCTGGTTAACCTTTTTtccagtatca-------------
hsa-mir-329-2 --------gtggtacctgaagagaggttttctgggtttctgtttctttattgaggacgaAACACACCTGGTTAACCTCTTTtccagtatcaa------------
hsa-mir-329-1 ----------ggtacctgaagagaggttttctgggtttctgtttctttaatgaggacgaAACACACCTGGTTAACCTCTTTtccagtatc--------------
cfa-mir-329b ----------ggtacctgaagAGAGGTTTTCTGGGTTTCTGTTTctttaatgaggatgaAACACACCTGGTTAACCTCTTTtccagtatc--------------
mml-mir-329-1 --------gtggtacctgaagggaggttttctgggtttctgtttctttaatgaggatgaAACACACCTGGTTAACCTCTTTtccagtatcaa------------
mml-mir-329-2 ----------ggtacctgaagggaggttttctgggtctctgtttctttactgaggatgaAACACACCTGGTTAACCTCTTTtccagtatc--------------
ptr-mir-329-2 -----------gtacctgaagagaggttttctgggtttctgtttctttattgaggatgaAACACACCTGGTTAACCTCTTTtccagtatc--------------
ptr-mir-329-1 -----------gtacctgaagagaggttttctgggtttctgtttctttaatgaggacgaAACACACCTGGTTAACCTCTTTtccagtatc--------------
ppy-mir-329-2 --------gtggtacctgaagagaggttttctgggtttctgtttctttattgaggatgaAACACACCTGGTTAACCTCTTTtccagtatca-------------
ppy-mir-329-1 ----------ggtacctgaagagaggttttctgggtttctgtttctttaatgaggatgaAACACACCTGGTTAACCTCTTTtccagtatc--------------
eca-mir-329 gttaatcagtggtacctgaagagaggttttctgggtttctgtttctttaatgaagatgaAACACACCTAGTTAACCTCTTTtccagtatcagatcc--------
228178_3 AACACACCTAGTTAACCTCTTT 859,820,39,22,21,1,3
cluster#=12 referenceSeqID=bta-mir-33a reads#=1 mir#=11
bta-mir-33a ctgcgGTGCATTGTAGTTGCATTGCAtgttctggcggtacccgtgcaatgtttccacagtgcatcacag
hsa-mir-33a ctgtgGTGCATTGTAGTTGCATTGCAtgttctggtggtacccatgCAATGTTTCCACAGTGCATCACag
cfa-mir-33 -----GTGCATTGTAGTTGCATTGCatgttctggcggtacccgtgcaatgtttccacagtgcatca---
mdo-mir-33 ----gGTGCATTGTAGTTGCATTGCAcgtcgtgtccgggcc-gtgcaatgtttccacagtgcatcccag
mml-mir-33a ctgcgGTGCATTGTAGTTGCATTGcatgttctggtggtacccatgcaatgtttccacagtgcattacag
ppy-mir-33 ctgcgGTGCATTGTAGTTGCATTGcatgttctggtggtacccatgcaatgtttccacagtgcatcacag
oan-mir-33b ctgtcGTGCATTGTAGTTGCATTGcacgttccggcagtactggtgCAATGTTCCCACAGTGCATTacag
oan-mir-33a ctgtaGTGCATTGTAGTTGCATTGcatgttctgac---cagggtgCAATGCCCCTGCAGTGCAATacag
mmu-mir-33 ctgtgGTGCATTGTAGTTGCATTGCAtgttctggcaatacctgtgCAATGTTTCCACAGTGCATCACgg
rno-mir-33 ccgtgGTGCATTGTAGTTGCATTGCAtgttctggcagtacctgtgCAATGTTTCCACAGTGCATCAcgg
eca-mir-33a ctgtgGTGCATTGTAGTTGCATTGCAtgttctggcggtacccatgcaatgtttccacagtgcatcacag
1952320_1 ACAGTGCATTACAGAACTTTGT 44,22,22,22,11,11,5
cluster#=13 referenceSeqID=bta-mir-130b reads#=1 mir#=11
bta-mir-130b ggcctgcctgacactctttccctgttgcactactgtgcgcccctggcaagCAGTGCAATGATGAAAGGGCATcggtcaggcc
hsa-mir-130b ggcctgcccgacACTCTTTCCCTGTTGCACTACtataggccgctgggaagCAGTGCAATGATGAAAGGGCATcggtcaggtc
ssc-mir-130b -gcctgcctgacactctttccctgttgcactactgtgggccactgggaagCAGTGCAATGATGAAAGGGCATcagtcaggc-
cfa-mir-130b ------------actctttccctgttgcactactgtgggccgctgggaagCAGTGCAATGATGAAAGGGCAT----------
mml-mir-130b ggcctgcccgacactctttccctgttgcactactgtgggccactgggaagCAGTGCAATGATGAAAGGGCATcggtcaggtc
ptr-mir-130b -gcctgcccgacactctttccctgttgcactactatgggccgctgggaagCAGTGCAATGATGAAAGGGCATcggtcaggtc
ppy-mir-130b ggcctgcccgacactctttccctgttgcactactatgggccgctgggaagCAGTGCAATGATGAAAGGGCATcggtcaggtc
oan-mir-130c cgccggccggaGCCCTTTTGCC-GTTGTGCTACtgagcg----tgaggagCAGTGCAATGGTAAAAGGGCATcggctggcgg
mmu-mir-130b ggcttgttggacACTCTTTCCCTGTTGCACTACTgtgggcctctgggaagCAGTGCAATGATGAAAGGGCATctgtcgggcc
rno-mir-130b ggcttgctggacACTCTTTCCCTGTTGCACTACTgtgggcctctgggaagCAGTGCAATGATGAAAGGGCATccgtcaggcc
eca-mir-130b ggcctgcctgacactctttccctgttgcactactgtgggctgctgg-aagCAGTGCAATGATGAAAGGGCATcggtcaggcc
975374_1 CAGTGCAATGGTAAAAGGGCAT 776,740,36,22,21,1,3
cluster#=14 referenceSeqID=bta-mir-30a reads#=2 mir#=11
bta-mir-30a cTGTAAACATCCTCGACTGGAAGCTgtgaggctgcagaaaggctttcagtcggatgtttgcagctgc
hsa-mir-30a cTGTAAACATCCTCGACTGGAAGctgtgaagccacagatgggCTTTCAGTCGGATGTTTGCAGCtgc
ssc-mir-30a cTGTAAACATCCTCGACTGGAAGctgtgaggctgaagacgggCTTTCAGTCGGATGTTTGCAGCcgc
cfa-mir-30a -TGTAAACATCCTCGACTGGAAGCtgtgaagccacagatgggctttcagtcggatgtttgcagc---
mdo-mir-30a cTGTAAACATCCTCGACTGGAAGctgtgaagcagcagaggggctttcagtcggatgtttgcagctgc
mml-mir-30a cTGTAAACATCCTCGACTGGAAGctgtgaagccatagatgggCTTTCAGTCGGATGTTTGCAGCtgc
oan-mir-30a cTGTAAACATCCTCGACTGGAAGCtgtgaagcagcagaggggCTTTCAGTCGGATGTTTGCAGCtgc
oan-mir-30d cTGTAAACATCCCCGACTGGAAGCtgt-aaaataccttcaagCTTTCAGTCAGATGTTTGCTACcac
mmu-mir-30a cTGTAAACATCCTCGACTGGAAGctgtgaagccacaaatgggCTTTCAGTCGGATGTTTGCAGCtgc
mmu-mir-30d cTGTAAACATCCCCGACTGGAAGctgt-aagccacagccaagCTTTCAGTCAGATGTTTGCTGCtac
rno-mir-30a cTGTAAACATCCTCGACTGGAAGctgtgaagccacaaatgggCTTTCAGTCGGATGTTTGCAGCtgc
1537331_1 CTGTAAACATCCCCGNCTGGA 773,765,8,21,20,1,5
552892_1 TTTCAGTCGGATGTTAGCAGCC 790,773,17,22,21,1,3
cluster#=15 referenceSeqID=bta-mir-135b reads#=1 mir#=13
bta-mir-135b ctctgctgtggccTATGGCTTTTCATTCCTATGTGAttactgttccaaactcatgtagggctaaaagccatgggctacagtgaggggcgcgcgcc
hsa-mir-135b ctctgctgtggccTATGGCTTTTCATTCCTATGTGAttgctgtcccaaactcATGTAGGGCTAAAAGCCATGGGctacagtgaggggcgagctcc
cfa-mir-135b ctctgctgtggccTATGGCTTTTCATTCCTATGTGAttgctgtttctaattcatgtagggctaaaagccatgggctacagtgaggggc-------
cfa-mir-135a-1 cctcgctgttctcTATGGCTTTTTATTCCTATGTGAtt-ttactgctcactcatatagggattggagccgtggcgtacggcgggg----------
cfa-mir-135a-2 ------------tTATGGCTTTTTATTCCTATGTGA-tagtaataaagtctcaTGTAGGGATGGAAGCCATGAAA--------------------
mdo-mir-135b ctctgctgtggccTATGGCTTTTCATTCCTATGTGattgctgttcccaactcatgtagggctaaaagccatgggctacagggaggggagagcctc
ptr-mir-135b ctctgctgtggccTATGGCTTTTCATTCCTATGTGAttgctgtcccaaactcatgtagggctaaaagccatgggctacagtgaggggcgagctc-
ppy-mir-135b ctctgctgtggccTATGGCTTTTCATTCCTATGTGAttgctgtcccaaactcatgtagggctaaaagccatgggctacagtgaggggcaagctcc
mmu-mir-135b ctctgctgtggccTATGGCTTTTCATTCCTATGTGAttgctgctccgaactcATGTAGGGCTAAAAGCCATGGGctacagtgaggggcaagctcc
mmu-mir-135a-1 cctcactgttctcTATGGCTTTTTATTCCTATGTGAtt-ctattgctcgctcaTATAGGGATTGGAGCCGTGGCGtacggtgaggata-------
mmu-mir-135a-2 cactctagtgcttTATGGCTTTTTATTCCTATGTGA-tcgtaataaagtctcaTGTAGGGATGGAAGCCATGAAatacattgtgaaaattca---
rno-mir-135b ctctgctgtggccTATGGCTTTTCATTCCTATGTGAttgctgttccgaactcATGTAGGGCTAAAAGCCATGGGctacagtgaggggcaagctcc
eca-mir-135b ctctgctgtggccTATGGCTTTTCATTCCTATGTGAttgctgttctaaactcatgtagggctaaaagccatgggctacagtgaggggc-------
1858825_1 ATAGGGATTGGAGCCGTGGCAT 764,745,19,22,21,1,3
cluster#=16 referenceSeqID=bta-mir-34c reads#=1 mir#=10
bta-mir-34c agtctagttactAGGCAGTGTAGTTAGCTGATTGctaataataccaatcactaaccacacggccaggtaaaaagatt
bta-mir-449b cctgaatcaggtAGGCAGTGTAGTTAGCTGGCtgctttgggtcaattcagcagccacaactgccctgccacttgctt
hsa-mir-34c agtctagttactAGGCAGTGTAGTTAGCTGATTGCtaatagtaccAATCACTAACCACACGGCCAGGtaaaaagatt
hsa-mir-449b cctgaatcaggtAGGCAGTGTAGTTAGCTGGCtgcttgggtcaagtcagCAGCCACAACTACCCTGCCACTtgcttc
ssc-mir-34c agtctagttactAGGCAGTGTAGTTAGCTGATTGCtgataaaaccaatcactaaccacacggccaggtaaaaagatt
cfa-mir-34c ------------AGGCAGTGTAGTTAGCTGATTGCtaatagtaccaatcactaaccacacggccagg----------
mml-mir-34c agtctagttaccAGGCAGTGTAGTTAGCTGATTGCtgatagtaccAATCACTAACCACACGGCCAGGtaaaaagatt
mml-mir-449b cctgaatcaggtAGGCAGTGTAGTTAGCTGGCtgcttgagtcaagtcagcagccacaactaccctgccacttgcttc
ptr-mir-449b cctgaatcaggtAGGCAGTGTAGTTAGCTGGCtgcttgggtcaagtcagcagccacaactaccctgccacttgcttc
ppy-mir-449b cctgaatcaggtAGGCAGTGTAGTTAGCTGGCtgctttggtcaagtcagcagccacaactaccctgccacttgcttc
1847157_1 AGGCAGTGTATTGTTAGCTGG 791,415,376,21,11,10,5
cluster#=17 referenceSeqID=bta-mir-206 reads#=145 mir#=10
bta-mir-206 tgcttcccaaggccacatgcttctttatatccccatacggattactttgctaTGGAATGTAAGGAAGTGTGTGGtttcggcgagcg
hsa-mir-206 tgcttcccgaggccacatgcttctttatatccccatatggattactttgctaTGGAATGTAAGGAAGTGTGTGGtttcggcaagtg
ssc-mir-206 ---ttcccgaggccacatgcttctttatatccccatacggattacttgactaTGGAATGTAAGGAAGTGTGTGAtctcgttaa---
cfa-mir-206 --------------acatgcttctttatatccccatacggattacgttgctaTGGAATGTAAGGAAGTGTGTGG------------
mdo-mir-206 --------gaggcaacatgcttctttatatccccatatgaattatgctgctaTGGAATGTAAGGAAGTGTGTGgtttcgggaag--
ptr-mir-206 -gcttcccgaggccacatgcttctttatatccccatatggattactttgctaTGGAATGTAAGGAAGTGTGTGGtttcggcaagtg
oan-mir-206 tgctctccgagacaACATGCTTCTTTATATCCCCAtatggattacgctgctaTGGAATGTAAGGAAGTGTGTGGtttcgggccaga
mmu-mir-206 -------ccaggccACATGCTTCTTTATATCCTCATAgatatctcagcactaTGGAATGTAAGGAAGTGTGTGGttttgg------
rno-mir-206 --cttccccaggccACATGCTTCTTTATATCCTCATagatatcactgcgctaTGGAATGTAAGGAAGTGTGTGGttttggcaagtg
eca-mir-206-2 ---------aggccacatgcttctttatatccccatacggattactttgctaTGGAATGTAAGGAAGTGTGTGGtttc--------
21027_63 TGGAATGTAAGGAAGCGTGTGA 760,743,17,22,21,1,3
78015_17 TGGAATGTAAGGCAGTGTGTGA 687,672,15,22,21,1,3
78040_13 TGGAATGTAAGGACGTGTGTGA 696,680,16,22,21,1,3
102144_9 TGGAATGTAAGGAAGCGTGTGGTTTT 871,852,19,26,25,1,3
111876_7 TGGAATGTAAGGAAGGGTGTGA 777,762,15,22,21,1,3
146865_6 TGGAATGTAAGGCAGTGTGTGGTTTT 786,768,18,26,25,1,3
161746_4 TGGAATGTAAGGAAGTGTGCGA 699,680,19,22,21,1,3
215867_3 TGGAATGTAAGGACGTGTGTGGTTTT 839,824,15,26,25,1,3
212774_3 TGGAATGTAAGGGAGTGTGTGA 815,793,22,22,21,1,3
210487_3 TGGAATGTGAGGAAGTGTGTGA 772,757,15,22,21,1,3
227904_3 TGGAATGTCAGGAAGTGTGTGA 708,687,21,22,21,1,3
235451_3 TGGGATGTAAGGAAGTGTGTGA 683,663,20,22,21,1,3
225737_3 TGGAATGTAAGGAAGTGCGTGA 677,661,16,22,21,1,3
365774_2 TGGAATGTAAGGAAGTGTGTGATC 921,882,39,24,23,1,3
277238_2 TGGAATGTACGGAAGTGTGTGGTTTT 841,826,15,26,25,1,3
333877_2 TGGAATGTAAGTAAGTGTGTGA 795,774,21,22,21,1,3
1353262_1 TGGAATGTAAGGAGGTGTGTGGTTTT 972,955,17,26,25,1,3
1045022_1 CGGAATGTAAGGAAGTGTGTGGTTTT 720,703,17,26,25,1,3
cluster#=18 referenceSeqID=bta-mir-1-2 reads#=24 mir#=15
bta-mir-1-2 acctactcagagtacatacttctttatgtacccatatgaacatacaatgctaTGGAATGTAAAGAAGTATGTATttttggtaggc
bta-mir-1-1 ----gcttgggaaacatacttctttatgtgcccatatggacctgctaagctaTGGAATGTAAAGAAGTATGTATttcagg-----
hsa-mir-1-2 acctactcagagtacatacttctttatgtacccatatgaacatacaatgctaTGGAATGTAAAGAAGTATGTATttttggtaggc
hsa-mir-1-1 -------tgggaaacatacttctttatatgcccatatggacctgctaagctaTGGAATGTAAAGAAGTATGTATctca-------
cfa-mir-1-2 --------------catacttctttatgtacccatatgaacatacaatgctaTGGAATGTAAAGAAGTATGTA------------
cfa-mir-1-1 --------------catacttctttatatgcccatatggacctgctaagctaTGGAATGTAAAGAAGTATGTA------------
mdo-mir-1 acctactcagagtacatacttctttatgtacccatatgaacatacaatgctaTGGAATGTAAAGAAGTATGTAtttttggtaggt
mml-mir-1-2 -------cagagtacatacttctttatgtacccatatgaacatacaaggctaTGGAATGTAAAGAAGTATGTATtttgg------
mml-mir-1-1 ----gcttgggaaacatacttctttatatgcccatatggacctgctaagctaTGGAATGTAAAGAAGTATGTATctcaggc----
ptr-mir-1-2 acctactcagagtacatacttctttatgtacccatatgaacatacaatgctaTGGAATGTAAAGAAGTATGTATttttggtagg-
ptr-mir-1-1 --------gggaaacatacttctttatatgcccatatggacctgctaagctaTGGAATGTAAAGAAGTATGTATctca-------
oan-mir-1a acctgctcagagtacatacttctttatgtacccatatgaacataaaaagctaTGGAATGTAAAGAAGTATGTATttttggcaggc
rno-mir-1 gcctactcagaGCACATACTTCTTTATGTACCCatatgaacatagaatgctaTGGAATGTAAAGAAGTGTGTATtttgggtaggt
eca-mir-1 ---tactcagagtacatacttctttatgtacccatatgaacatacaatgctaTGGAATGTAAAGAAGTATGTATttttggt----
eca-mir-1-2 ----gcttgggaaacatacttctttatatgcccatatggacctgctaagctaTGGAATGTAAAGAAGTATGTATttcagg-----
70420_14 TGGAATGTAAAGAAGCATGTATC 828,807,21,23,22,1,3
194523_5 TGGAATGTAACGAAGTATGTATC 691,675,16,23,22,1,3
784934_2 TGGAATGTAAAGAAGTCTGTATC 751,733,18,23,22,1,3
1351006_1 TGGAATGCAAAGAAGTATGTATC 858,835,23,23,22,1,3
1717406_1 TGGAATGTAAAGAAGACTGTATC 714,699,15,23,21,2,3
682036_1 TGGAATGTAAAGACGTATGTATCT 668,650,18,24,23,1,3
cluster#=19 referenceSeqID=bta-mir-129-2 reads#=1 mir#=16
bta-mir-129-2 ctgcccttcgcgaatCTTTTTGCGGTCTGGGCTTGCTgtacataactcaatagccggAAGCCCTTACCCCAAAAAGCATtcgcggagggcgcac
bta-mir-129-1 -----------ggatCTTTTTGCGGTCTGGGCTTGCTgttcctctctcagtagcaggaagcccttaccccaaaaagtatct-------------
hsa-mir-129-2 -tgcccttcgcgaatCTTTTTGCGGTCTGGGCTTGCtgtacataactcaatagccggAAGCCCTTACCCCAAAAAGCATttgcggagggcg---
hsa-mir-129-1 -----------ggatCTTTTTGCGGTCTGGGCTTGCtgttcctctcacagtagcaggAAGCCCTTACCCCAAAAAGTATct-------------
ssc-mir-129a -----cttcgtgaatCTTTTTGCGGTCTGGGCTTGCtgtacataactcaatagccggAAGCCCTTACCCCAAAAAGCATtcgcgg---------
ssc-mir-129b -----ccctttggatCTTTTTGCGGTCTGGGCTTGCtgttcctctctcagtagcaggaagcccttaccccaaaaagtatctgcggga-------
mdo-mir-129 ----------tggatCTTTTTGCGGTCTGGGCTTGCTgtccttaaatcagtagcaggaagcccttaccccaaaaagtatcta------------
ptr-mir-129-2 --gcccttcgcgaatCTTTTTGCGGTCTGGGCTTGCtgtacataactcaatagccggaagcccttaccccaaaaagcatttgcggagggcg---
ptr-mir-129-1 ------------gatCTTTTTGCGGTCTGGGCTTGCtgttcctctcacagtagcaggaagcccttaccccaaaaagtatct-------------
oan-mir-129 ccgtctcccttggatCTTTTTGCGGTCTGGGCTTGCtgttccttaatcagtagcaggAAGCCCTTACCCCAAAAAGTatctgcgagagacctgg
mmu-mir-129-2 -tgcctttcgcgaatCTTTTTGCGGTCTGGGCTTGCtgtacataactcaatagccggAAGCCCTTACCCCAAAAAGCATtcgcggagggcg---
mmu-mir-129-1 ----------tggatCTTTTTGCGGTCTGGGCTTGCtgttctctcgacagtagcaggAAGCCCTTACCCCAAAAAGTATcta------------
rno-mir-129-2 ctgcccttcgcgaatCTTTTTGCGGTCTGGGCTTGCtgtacataactcaatagccggAAGCCCTTACCCCAAAAAGcattcgcggagggcgcgc
rno-mir-129-1 ----------tgggtCTTTTTGCGGTCTGGGCTTGCtgttctctccacagtagcaggAAGCCCTTACCCCAAAAAGtatct-------------
eca-mir-129b ---------gcgaatCTTTTTGCGGTCTGGGCTTGCtgtacataactcaatagccggAAGCCCTTACCCCAAAAAGCATtcgc-----------
eca-mir-129a ----------tggatCTTTTTGCGGTCTGGGCTTGCtgttcctctcacagtagcaggAAGCCCTTACCCCAAAAAGTATct-------------
1122291_1 AAGCCCTTACCCCAAAAAGTATC 916,876,40,23,22,1,3
cluster#=20 referenceSeqID=bta-mir-128-1 reads#=91 mir#=17
bta-mir-128-1 tgagctgttggattcggggccgtagcactgtctgagaggtttacatttcTCACAGTGAACCGGTCTCTTTttcagctgcttc
bta-mir-128-2 tgtgcagtgggaaggggggccgaggcactgtccgagaggagtacaggtcTCACAGTGAACCGGTCTCTTTccctactgtgtc
hsa-mir-128-1 tgagctgttggattcggggccgtagcactgtctgagaggtttacatttcTCACAGTGAACCGGTCTCTTTttcagctgcttc
hsa-mir-128-2 tgtgcagtgggaaggggggccgatacactgtacgagaggagtacaggtcTCACAGTGAACCGGTCTCTTTccctactgtgtc
ssc-mir-128-1 tgagctgttggattcggggccgtagcactgtctgagaggtttacatttcTCACAGTGAACCGGTCTCTTTttcagctgcttc
ssc-mir-128-2 ---gcagtgggaaggggggccgaggcactgtccgagaggagtacaggtcTCACAGTGAACCGGTCTCTTTccctactgtgt-
mdo-mir-128 tgtgcagcaggaaggggggccgttacactgtcagagaggagtacaggtcTCACAGTGAACCGGTCTCTTTccctgctgtggc
ptr-mir-128-1 tgagctgttggattcggggccgtagcactgtctgagaggtttacatttcTCACAGTGAACCGGTCTCTTTttcagctgcttc
ptr-mir-128-2 -gtgcagtgggaaggggggccgatacactgtacgagaggagtacaggtcTCACAGTGAACCGGTCTCTTTccctactgtgtc
oan-mir-128-1 ------gctggattcggggccgatacacggtctgaggggtttacgagtcTCACAGTGAACCGGTCTCTTTttcagtt-----
oan-mir-128-2 TGGACAGCCGGAAGgggggccgttacactgtaagagaggagtacaggtcTCACAGTGAACCGGTCTCTTTcccgactggatc
mmu-mir-128-1 ------gttggattCGGGGCCGTAGCACTGTCTGAgaggtttacatttcTCACAGTGAACCGGTCTCTTTttcagc------
mmu-mir-128-2 ----cagtgggaagGGGGGCCGATGCACTGTAAGAGAggagtacaggtcTCACAGTGAACCGGTCTCTTTccctactg----
rno-mir-128-1 tgagctgttggattCGGGGCCGTAGCACTGTCTGAgaggtttacatttcTCACAGTGAACCGGTCTCTTTttcagctgcttc
rno-mir-128-2 tgtgcagtgggaagGGGGGCCGATGCACTGTAAGAgaggagtacaggtcTCACAGTGAACCGGTCTCTTTccctactgtgtc
eca-mir-128-2 ------gttggattcggggccgtagcactgtctgagaggtttacatttcTCACAGTGAACCGGTCTCTTTttcagc------
eca-mir-128 tgtgcagtgggaaggggggccgatgcactgtacgagaggagtacaggtcTCACAGTGAACCGGTCTCTTTccctactgtgtc
143641_8 GGGGGCCGAGGCACTGTCCGAGA 822,786,36,23,22,1,5
332112_2 GGGGGCCGAGGCACTGTCCGA 760,725,35,21,20,1,5
483281_1 GGGGGCCGAGGCACTGTCCGAG 838,799,39,22,21,1,5
21382_55 TCACAGTGAACCGGTCTCTTTCC 844,877,-33,23,22,1,3
107051_7 TCACAGTGAACCGGTTTCTTTC 786,764,22,22,21,1,3
128363_5 TCACAGCGAACCGGTCTCTTTC 792,775,17,22,21,1,3
167346_4 TCACAGTGAACCGGTGTCTTTC 777,757,20,22,21,1,3
245568_2 TCACCGTGAACCGGTCTCTTTC 777,759,18,22,21,1,3
284858_2 TCACAGTGGACCGGTCTCTTTC 701,679,22,22,21,1,3
1063417_1 TCACAGTGAACCGGTATCTTTCC 836,815,21,23,22,1,3
1937477_1 TCACAGTGAACCGGTCTCTTTCCTT 800,777,23,25,24,1,3
1578277_1 CACAGTGAACCGGTCTCTTTCC 756,729,27,22,21,1,3
1000028_1 TCACAGTGACCCGGTCTCTTTCC 716,704,12,23,22,1,3
528673_1 TCACAGTTAACCGGTCTCTTTC 631,612,19,22,21,1,3
cluster#=21 referenceSeqID=bta-mir-145 reads#=1 mir#=9
bta-mir-145 caccttgtcctcacgGTCCAGTTTTCCCAGGAATCCCTtagatgctaagatggggattcctggaaatactgttcttgaggtcatggtt
ssc-mir-145 caccttgtcctcacgGTCCAGTTTTCCCAGGAATCCCTTagatgctgagatggggattcctggaaatactgttcttgaggtcatgg--
cfa-mir-145 -----tgtcctcacgGTCCAGTTTTCCCAGGAATCCCTtagatgctaagatggggattcctggaaatactgttcttgaggtcatggtt
mdo-mir-145 ---------ctcaggGTCCAGTTTTCCCAGGAATCCCTtagatgctaagatggggattcctggaaatactgttcttgag---------
mml-mir-145 caccttgtcctcacgGTCCAGTTTTCCCAGGAATCCCTTaaatgctaagatggggattcctggaaatactgttcttgaggtcatggtt
oan-mir-145 caccgtgtc-tca-gGTCCAGTTTTCCCAGGAATacat-aggtgctgagatggggATTCCTGGAAATACTGTTCTTgaggtcatggct
mmu-mir-145 ---------ctcacgGTCCAGTTTTCCCAGGAATCCCTtggatgctaagatggggATTCCTGGAAATACTGTTCTTGag---------
rno-mir-145 caccttgtcctcacgGTCCAGTTTTCCCAGGAATCCCTtggatgctaagatggGGATTCCTGGAAATACTGTTCttgaggtcatggct
eca-mir-145 ---------ctcacgGTCCAGTTTTCCCAGGAATCCCTtagatgctaagatggggattcctggaaatactgttcttgag---------
589083_1 GTCCAGTTTTCCCCGGAATA 576,553,23,20,19,1,5
cluster#=22 referenceSeqID=bta-mir-199a-1 reads#=17 mir#=20
bta-mir-199a-1 tggaagcttctggagatcctgctccgtcgcCCCAGTGTTCAGACTACCTGTTcaggacaatgccgttgtACAGTAGTCTGCACATTGGTTAgactgggcaaggg
bta-mir-199b ---------------cctccactccgtctaCCCAGTGTTTAGACTATCTGTTCaggactcccaaattgtACAGTAGTCTGCACATTGGTTAggctgggctgggt
bta-mir-199a-2 -------------------------gccaaCCCAGTGTTCAGACTACCTGTTcagggctctgaatgtgtACAGTAGTCTGCACATTGGTTAggc----------
bta-mir-199c -----------------------atcagtggttcttacggtgtgtttgctactattgaaacgtcagtgTACAGTAGTCTGCACATTGGcttcttgtgat-----
hsa-mir-199a-2 aggaagcttctggagatcctgctccgtcgcCCCAGTGTTCAGACTACCTGTTCaggacaatgccgttgtACAGTAGTCTGCACATTGGTTAgactgggcaaggg
hsa-mir-199b -----ccagaggacacctccactccgtctaCCCAGTGTTTAGACTATCTGTTCaggactcccaaattgtACAGTAGTCTGCACATTGGTTAggctgggctgggt
hsa-mir-199a-1 -------------------------gccaaCCCAGTGTTCAGACTACCTGTTCaggactctcaatgtgtACAGTAGTCTGCACATTGGTTAggc----------
ssc-mir-199a-1 ----------------------tccgtcgcCCCAGTGTTCAGACTACCTGTTCaggacaatgccgttgtaCAGTAGTCTGCACATTGGTTAgactggg------
ssc-mir-199b -----------------------ccgtctaCCCAGTGTTTAGACTATCTGTTcaggactcccaaattgtaCAGTAGTCTGCACATTGGTTAggctgg-------
ssc-mir-199a-2 ---------------------ccccgccaaCCCAGTGTTCAGACTACCTGTTCagggctctgaatgtgtaCAGTAGTCTGCACATTGGTTAggctgggc-----
mml-mir-199a-1 aggaagcttctggagatcctgctccgtcgcCCCAGTGTTCAGACTACCTGTTCaggacaatgccgttgtACAGTAGTCTGCACATTGGTTAgactgggcaaggg
mml-mir-199a-2 -------------------------gccaaCCCAGTGTTCAGACTACCTGTTCaggactctcaacgtgtACAGTAGTCTGCACATTGGTTAggc----------
ptr-mir-199a-2 aggaagcttctggagatcctgctccgtcgcCCCAGTGTTCAGACTACCTGTTCaggacaatgccgttgtACAGTAGTCTGCACATTGGTTAgactgggcaaggg
ptr-mir-199b -----ccagaggacacctccactccgtctacccagtgtttagactatctgttcaggactcccaaattgtACAGTAGTCTGCACATTGGTTAggctgggctgggt
ptr-mir-199a-1 -------------------------gccaaCCCAGTGTTCAGACTACCTGTTCaggactctcaatgtgtACAGTAGTCTGCACATTGGTTAgg-----------
ppy-mir-199b -----ccagaggacacctccactccgtctaccttGTGTTTAGACTATCTGTTCaggactcccaaattgtACAGTATTCTGCACATTGGTTAggctgggctgggt
mmu-mir-199a-2 tggaagcttcaggagatcctgctccgtcgcCCCAGTGTTCAGACTACCTGTTCaggacaatgccgttgtACAGTAGTCTGCACATTGGTTAgactgggcaaggg
mmu-mir-199b -----ccagaggatacctccactccgtctaCCCAGTGTTTAGACTACCTGTTCaggactcccaaattgtACAGTAGTCTGCACATTGGTTAggctgggctgggt
mmu-mir-199a-1 -------------------------gccatCCCAGTGTTCAGACTACCTGTTCaggaggctggacatgtACAGTAGTCTGCACATTGGTTAggc----------
eca-mir-199a ------------------------------CCCAGTGTTCAGACTACCTGTTCaggacaatgccgttgtACAGTAGTCTGCACATTGGTAG-------------
132107_5 ACAGTAGTCTGCACACTGGTA 743,726,17,21,20,1,3
214689_4 TACAGTAGTCTGCACATTGGTAG 870,832,38,23,22,1,3
988974_1 ACAGTAGTCTCCACATTGGTA 768,751,17,21,20,1,3
1557204_1 ACAGTATTCTGCACATTGGTC 706,687,19,21,20,1,3
893205_1 ACAGTAGTCTGCCCATTGGTA 704,685,19,21,20,1,3
732950_1 ACAGTCGTCTGCACATTGGTA 591,573,18,21,20,1,3
1559382_1 ACAGTAGTCTGCCCATTGGCTC 591,570,21,22,20,2,3
1035759_1 ACAGTAGTCTGCACCTTGGTA 578,556,22,21,20,1,3
1818339_1 ACAGCATTCTGCACATTGGT 498,487,11,20,19,1,3
1961353_1 TCAGGAGGCTGGGAT 525,310,215,15,9,6,3
cluster#=23 referenceSeqID=oar-mir-379 reads#=366 mir#=9
oar-mir-379 cctgattctggggtcagcaccactccacggttcctgcagagaTGGTAGACTATGGAACGTAGGCtgtgtgatttctgaccTATGTAACACGGTCCACTAACTctcagtatccaatccgtcctcgga
bta-mir-379 ---------------------------tggttcctgcagagaTGGTAGACTATGGAACGTAGGctttgtgatttttgacctatgtaacatggtccactaactctcagtatcca-------------
hsa-mir-379 -------------------------------------agagaTGGTAGACTATGGAACGTAGGcgttatgatttctgaccTATGTAACATGGTCCACTAACTct----------------------
cfa-mir-379 ------------------------------------------TGGTAGACTATGGAACGTAGGctttgtgatttttgacctatgtaacatggtccactaac-------------------------
mml-mir-379 -------------------------------------agagaTGGTAGACTATGGAACGTAGGcgttatgatttttgacctatgtaacatggtccactaactct----------------------
ptr-mir-379 --------------------------------------gagaTGGTAGACTATGGAACGTAGGcgttatgatttctgacctatgtaacatggtccactaactct----------------------
mmu-mir-379 -------------------------------------agagaTGGTAGACTATGGAACGTAGGcgttatg-tttttgaccTATGTAACATGGTCCACTAACTct----------------------
rno-mir-379 ---------------------------tggttcctgcagaggTGGTAGACTATGGAACGTAGGcgttatg-tttctgacCTATGTAACATGGTCCACTAACtctcagtatcca-------------
eca-mir-379 -------------------------------------agagaTGGTAGACTATGGAACGTAGGctttatgatttttgacctatgtaacatggtccactaactct----------------------
5051_289 TGGTAGACTATGGAACGTAGGCGT 898,860,38,24,23,1,5
27833_42 TGGTAGACTATGGAACGTAGGCGTT 965,926,39,25,24,1,5
113659_13 TGGTAGACTATGGAACGTAGGCCT 822,804,18,24,23,1,5
1162467_4 TGGTAGACTATGGAACGCAGGCTT 756,739,17,24,23,1,5
179656_3 GGTAGACTATGGAACGTAGGCGT 840,805,35,23,22,1,5
246513_2 TGGTAGACTATGGAACGTAGGCTTTA 1012,973,39,26,25,1,5
294710_2 TGGTAGACTATGGAATGTAGGCTT 890,873,17,24,23,1,5
1960632_1 TGGTAGACTATGGAACGTAGGCGTTAT 976,938,38,27,26,1,5
1343947_1 TGGTAGACTATGGAATGTAGGCGTT 896,890,6,25,24,1,5
1898603_1 TGGTAGACTCTGGAACGTAGGCTT 856,838,18,24,23,1,5
909607_1 TGGTAGACTATGGACCGTAGGCGT 849,838,11,24,23,1,5
759067_1 TGGTAGACTATGGAAGGTAGGCGT 827,820,7,24,23,1,5
1216030_1 TGGTAGACTATGGCACGTAGGCGT 788,777,11,24,23,1,5
865383_1 TGGTAGAATATGGAACGTAGGCTT 754,739,15,24,23,1,5
1033467_1 TGGTAGACTATGGAAAGTAGGCGTT 745,735,10,25,24,1,5
1668734_1 TGGTAGACTATGGAACGTAGGGTTT 753,731,22,25,24,1,5
1390771_1 TGGGAGACTATGGAACGTAGGCGT 704,686,18,24,23,1,5
1983471_1 NGGTAGACTATGGAACGTAGGCGT 473,469,4,24,23,1,5
cluster#=24 referenceSeqID=bta-mir-183 reads#=1 mir#=9
bta-mir-183 ctgtgTATGGCACTGGTAGAATTCACTGtgaacagtctcggtcagtgaattaccgaagggccataaacag
hsa-mir-183 ctgtgTATGGCACTGGTAGAATTCACTgtgaacagtctcagtcaGTGAATTACCGAAGGGCCATAAacag
cfa-mir-183 -----TATGGCACTGGTAGAATTCACTgtgaacagtctcggtcagtgaattaccgaagggccataaa---
sla-mir-183 ctgtgTATGGCACTGGTAGAATTCACTGtgaacagtctcggtcagtgaattaccgaagggccataaacag
mml-mir-183 ctgtgTATGGCACTGGTAGAATTCACTGtgaacagtctcggtcagtgaattaccgaagggccataaacag
ppy-mir-183 ctgtgTATGGCACTGGTAGAATTCACTgtgaacagtctcagtcagtgaattaccgaagggccataaacag
mmu-mir-183 ctgtgTATGGCACTGGTAGAATTCACTgtgaacagtctcagtcaGTGAATTACCGAAGGGCCATAAacag
rno-mir-183 ctgtgTATGGCACTGGTAGAATTCACTgtgaacagtctcggtcagTGAATTACCGAAGGGCCATAAacag
eca-mir-183 ctgtgTATGGCACTGGTAGAATTCACTgtgaacagtctcggtcagtgaattaccgaagggccataaaca-
1311678_1 TCAGTGAACTACCGAACTTTGT 44,30,14,22,15,7,3
cluster#=25 referenceSeqID=oar-mir-299 reads#=3 mir#=9
oar-mir-299 tgccatcgtgcggtacttgaagaaaTGGTTTACCGTCCCACATACATtctgaatatgTATGTGGGACGGTAAACCGCTTcttggtatcctgcccagccatcaaa
bta-mir-299 -------------------aagaaaTGGTTTACCGTCCCACATACATtctgaatatgtatgtgggacggtaaaccgcttctt----------------------
hsa-mir-299 -------------------aagaaaTGGTTTACCGTCCCACATACATtttgaatatgTATGTGGGATGGTAAACCGCTTctt----------------------
ssc-mir-299 ----------cggtacttgaagaaATGGTTTACCGTCCCACATACattttgcatatgtatgtgggacggtaaaccgcttcttggtatcc---------------
cfa-mir-299 -------------------aagaaaTGGTTTACCGTCCCACATACATtttgagtatgtatgtgggacggtaaaccgcttctt----------------------
mml-mir-299 -------------------aagaaaTGGTTTACCGTCCCACATACATtttcaatatgTATGTGGGACGGTAAACCGCTTctt----------------------
ptr-mir-299 -------------------aagaaaTGGTTTACCGTCCCACATACATtttgaatatgtatgtgggacggtaaaccgcttcttggtatc----------------
ppy-mir-299 -------------------aagaaaTGGTTTACCGTCCCACATACATtttgaatatgTATGTGGGACGGTAAACCGCTTctt----------------------
rno-mir-3563 gatggctgggctggataccaagaagCGGTTTACCGTCCCACATACatactcaaaatgTATGTGGGACGGTAAACcatttcttcaagtaccgcgtgacagcaggg
1911750_1 TATGTGGGACGGTAAACCAT 758,720,38,20,19,1,3
1491102_1 TATGTGGGATCGTAAACCGCT 537,526,11,21,20,1,3
1825590_1 TGTATGTGGGCTGGTAAACCGC 522,509,13,22,21,1,3
cluster#=26 referenceSeqID=bta-mir-16a reads#=5 mir#=14
bta-mir-16a gtcagcagtgcctTAGCAGCACGTAAATATTGGTGttaagattctaaaattatctccagtattaactgtgctgctgaagtaaggttggc
hsa-mir-16-1 gtcagcagtgcctTAGCAGCACGTAAATATTGGCGttaagattctaaaattatctCCAGTATTAACTGTGCTGCTGAagtaaggttgac
hsa-mir-16-2 ----gttccactcTAGCAGCACGTAAATATTGGCGtagtgaatatatattaaacaCCAATATT-ACTGTGCTGCTTTAgtgtgac----
ssc-mir-16-2 -----cagtgcctTAGCAGCACGTAAATATTGGCGttaagattctaaaattatctccagtattaactgtgctgctgaagtaagg-----
ssc-mir-16-1 ------tccgctcTAGCAGCACGTAAATATTGGCGtgtaaaataaatattaaacaccaatatt-attgtgctgctttagcgtg------
cfa-mir-16-1 -------------TAGCAGCACGTAAATATTGGCGttaagattctaaaattatctccagtattaactgtgctgctgaa-----------
cfa-mir-16-2 -------------TAGCAGCACGTAAATATTGGCGtagtgaaataaaaattaacaccaatatt-attgtgctgcttta-----------
mdo-mir-16 gtcaacagtgcctTAGCAGCACGTAAATATTGGCGttaagattttaaaagtatctccagtattaactgtgctgctgaagtaaggttggc
lla-mir-16 gtcagcagtgcctTAGCAGCACGTAAATATTGGCGctaagattctaaaattatctccagtattaactgtgctgctgaagtaaggttggc
ppy-mir-16 gtcagcagtgcctTAGCAGCACGTAAATATTGGcgttaagattctaaaattatctccagtattaactgtgctgctgaagtaaggttgac
ppy-mir-16-2 ----gttccactcTAGCAGCACGTAAATATTGGgcgtagaaatatatattaaacaccaatatt-actgtgctgctttagtgtgac----
oan-mir-16c gtcggccgtgcccTAGCAGCACGTAAATACTGGAGttgggatgcctcgttgctctCCAGTATT-GCATTGCTGCTTGAgcgaggccgga
eca-mir-16-2 -------------TAGCAGCACGTAAATATTGGCGttaagattctaaaattatctccagtattaactgtgctgctg-------------
eca-mir-16 ----gttccgctcTAGCAGCACGTAAATATTGGCGtagtgaaataaatattaacaccaatatt-attgtgctgctttagcgtggc----
532639_2 TAGCAGCACGTAAATATTGGCGC 910,870,40,23,22,1,5
359067_2 TAGCAGCACGTAAATATTGGGC 854,817,37,22,21,1,5
738763_1 TAGCAGCACGTAAATACTGGAG 860,820,40,22,21,1,5
cluster#=27 referenceSeqID=bta-mir-133a-2 reads#=233 mir#=14
bta-mir-133a-2 caatgctttgctagagctggtaaaatggaaccaaatcgcctcttcaatggaTTTGGTCCCCTTCAACCAGCTGtagctatgcattga
bta-mir-133a-1 gaatgctttgctaaagctggtaaaatggaaccaaatcaactgttcgatggaTTTGGTCCCCTTCAACCAGCTGtagctgcgcattga
hsa-mir-133a-1 caatgctttgctagagctggtaaaatggaaccaaatcgcctcttcaatggaTTTGGTCCCCTTCAACCAGCTGtagctatgcattga
hsa-mir-133a-2 aaatgctttgctagagctggtaaaatggaaccaaatcgactgtccaatggaTTTGGTCCCCTTCAACCAGCTGtagctgtgcattga
ssc-mir-133a-2 -----------tagAGCTGGTAAAATGGAACCAAATcgcctcttcaatggatTTGGTCCCCTTCAACCAGCTGtagctatgcat---
ssc-mir-133a-1 aaatgctttgctaaAGCTGGTAAAATGGAACCAAATcaactgttgaatggatTTGGTCCCCTTCAACCAGCTGtagctgcgcattga
ssc-mir-133b ------cctgctctggctggtcaaacggaaccaagtc-cgtcttcctgagaTTTGGTCCCCTTCAACCAGCTATagcagggctgg--
mml-mir-133a caatgctttgctagagctggtaaaatggaaccaaatcgcctcttcaatggatTT-GTCCCCTTCAACCAGCTGTagctatgcattga
oan-mir-133c tggccagctgctggggctggtcaaaaggaaccagatcgcctctccacctgaTTTGGTCCCCTTCAACCGGCTGcagcgggttgccgg
mmu-mir-133a-2 aaatgctttgctgaaGCTGGTAAAATGGAACCAAATcagctgttggatggaTTTGGTCCCCTTCAACCAGCTGtagctgcgcattga
mmu-mir-133a-1 ---------gctaaaGCTGGTAAAATGGAACCAAATcgcctcttcaatggaTTTGGTCCCCTTCAACCAGCTGtagc----------
rno-mir-133a caatgctttgctaaAGCTGGTAAAATGGAACCAAATcgcctcttcaatggaTTTGGTCCCCTTCAACCAGCTGtagctatgcattga
eca-mir-133a ---------gctagagctggtaaaatggaaccaaatcgcctcttcaatggaTTTGGTCCCCTTCAACCAGCTGtagc----------
eca-mir-133a-2 ---------gctaaagctggtaaaatggaaccaaatcaactgttcaatggaTTTGGTCCCCTTCAACCAGCTGtagc----------
17422_69 TTTGGTCCCCTTCAATCAGCTAT 811,790,21,23,22,1,3
54891_25 TTTGGTCCCCTTCACCCAGCTAT 715,700,15,23,22,1,3
47406_20 TTTGGTCCCCTTCAAGCAGCTAT 818,801,17,23,22,1,3
45522_21 TTTGGCCCCCTTCAACCAGCTAT 705,688,17,23,22,1,3
115643_9 TTTGGTCCCCTTAAACCAGCTAT 710,693,17,23,22,1,3
133257_6 TTTGGTCCACTTCAACCAGCTAT 805,787,18,23,22,1,3
145401_6 GTTGGTCCCCTTCAACCAGCTAT 804,787,17,23,22,1,3
112797_6 TTTGGTCCCATTCAACCAGCTAT 770,748,22,23,22,1,3
128852_6 TTTGGACCCCTTCAACCAGCTAT 752,730,22,23,22,1,3
160429_5 TTTGGTCCCCTTCAACAAGCTAT 802,781,21,23,22,1,3
168474_4 TTTGGTCCCCTTCCACCAGCTAT 746,725,21,23,22,1,3
189214_4 TTTGCTCCCCTTCAACCAGCTAT 745,724,21,23,22,1,3
225674_4 TTGGCCCCCTTCAACCAGCTAT 690,673,17,22,21,1,3
186701_3 TTCGGTCCCCTTCAACCAGCTAT 860,836,24,23,22,1,3
314747_3 TTTGGTCCCCTTGAACCAGCTAT 818,794,24,23,22,1,3
205236_3 TTTGGTCCGCTTCAACCAGCTAT 774,754,20,23,22,1,3
182697_3 TTGGTCCCCTTCAACGAGCTAT 763,742,21,22,21,1,3
236403_3 TTTGTCCCCTTCAACTAGCTGT 800,742,58,22,20,2,3
401856_3 TTTGGTCACCTTCAACCAGCTAT 744,729,15,23,22,1,3
167831_4 NTGTCCCCTTCAACCAGCTGT 542,515,27,21,19,2,3
361469_3 TTTGGTCCCCTTCAACCCGCTAT 608,590,18,23,22,1,3
377403_2 TTGGGCCCCTTCAACCAGCTAT 726,709,17,22,21,1,3
204151_3 NTTGTCCCCTTCAACCAGCTGT 321,307,14,22,20,2,3
1681665_1 TTTGGTCCCCTTAAACCAGCTATA 894,876,18,24,23,1,3
531468_1 TTTGGTCCCCTTCGACCAGCTAT 881,863,18,23,22,1,3
321349_2 ATTTGTCCCCTTCAACCAGCTGT 884,423,461,23,11,12,3
1500320_1 TTTGGTCCCCTTCAACCGGCTGC 865,826,39,23,22,1,3
624490_1 TTTGGTCCCCTACAACCAGCTAT 842,824,18,23,22,1,3
1645946_1 TTTGTCCCCTTCAACGAGCTGT 769,724,45,22,20,2,3
1365143_1 TTTGGTCCCCTTCAACCAGATAT 729,706,23,23,22,1,3
889415_1 TTGTCCCCTTCAACCNGCTGT 744,699,45,21,19,2,3
1337675_1 TTTGGTCACCTTCAACCAGCTATA 710,692,18,24,23,1,3
390744_2 TTGTCCCCCTCAACCAGCTGT 729,343,386,21,10,11,3
1423981_1 TGGTCCCCTCCAACCAGCTAT 672,653,19,21,20,1,3
2020342_1 TTTGTCCCCTTCACCCAGCTGT 679,633,46,22,20,2,3
544093_1 TGGTCCCCTTCAACAAGCTAT 654,631,23,21,20,1,3
1523792_1 TTGTCCCCTTCAATCAGCTGT 664,627,37,21,19,2,3
612049_1 NTTTGTCCCCTTCAACCAGCTGT 470,460,10,23,21,2,3
1104059_1 TTGCCCCCTTCAACCAGCTGTTT 347,297,50,23,19,4,3
cluster#=28 referenceSeqID=bta-mir-195 reads#=4 mir#=9
bta-mir-195 agctcccctggctcTAGCAGCACAGAAATATTGGCActgggaagaaagcctgccaatattggctgtgctgctccaggcagggtggtg
hsa-mir-195 agcttccctggctcTAGCAGCACAGAAATATTGGCacagggaagcgagtctgCCAATATTGGCTGTGCTGCTCCaggcagggtggtg
cfa-mir-195 --------------TAGCAGCACAGAAATATTGGCActgggaagagagtctgccaatattggctgtgctgctcta------------
mml-mir-195 agcttccctggctcTAGCAGCACAGAAATATTGGCacagggaagcaagtctgccaatattggctgtgctgctccaggcagggtggtg
ggo-mir-195 agcttcctgggctcTAGCAGCACAGAAATATTGGCacagggaagcgagtctgccaatattggctgtgctgctccaggcagggtggtg
ptr-mir-195 agcttccctggctcTAGCAGCACAGAAATATTGGCacagggaagcgagtctgccaatattggctgtgctgctccaggcagggtggt-
mmu-mir-195 aactctcctggctcTAGCAGCACAGAAATATTGGCatggggaagtgagtctgCCAATATTGGCTGTGCTGCTCCaggcagggtggtg
rno-mir-195 aactctcctggctcTAGCAGCACAGAAATATTGGCacgggtaagtgagtctgCCAATATTGGCTGTGCTGCTCCAggcagggtggtg
eca-mir-195 agctcccctggctcTAGCAGCACAGAAATATTGGCactgggaagagagtctgccaatattggctgtgctgctccaggcagggtggtg
1130173_2 CCAATATTGGCTGGGCTGCTCCC 636,623,13,23,21,2,3
517185_1 CCAATATTGACTGTGCTGCTCC 659,648,11,22,21,1,3
1593048_1 CCAATATTGGCTGTGCTGCTCC 603,636,-33,22,21,1,3
cluster#=29 referenceSeqID=bta-mir-339b reads#=1 mir#=8
bta-mir-339b TCCCTGTCCTCCAGGAGCTCcaggtctggggtgggtgtggggatttctgcaggaggga
hsa-mir-339 TCCCTGTCCTCCAGGAGCTCACGtgtgcctgcctgTGAGCGCCTCGACGACAGAGCCG
ssc-mir-4334 TCCCTGTCCTCCAGGAGCTCcccatgtgg-----------------------------
ssc-mir-339 TCCCTGTCCTCCAGGAGCTCACttaccttgggccgtgAGCTCCTCGAGGCCAGAGCCC
mml-mir-339 TCCCTGTCCTCCAGGAGCTCACGtgtgcctgcctgTGAGCGCCTCGACGACAGAGCCG
ppy-mir-339 TCCCTGTCCTCCAGGAGCTCACGtgtgcctgcctgtgagcgccttcgacgacaggagc
mmu-mir-339 TCCCTGTCCTCCAGGAGCTCACGtatgcctgcctgTGAGCGCCTCGGCGACAGAGCCG
rno-mir-339 TCCCTGTCCTCCAGGAGCTCACGtatgcctgcctgTGAGCGCCTCGACGACAGAGCCA
1277178_1 TCCCTGTCCTCCAGGAGCTCACTTAC 897,930,-33,26,25,1,5
cluster#=30 referenceSeqID=bta-mir-185 reads#=7 mir#=8
bta-mir-185 gggggtgagggacTGGAGAGAAAGGCAGTTCCTGAtggtcccctccccaggggctggctttcctccggcccctccttcc
hsa-mir-185 gggggcgagggatTGGAGAGAAAGGCAGTTCCTGAtggtcccctccccAGGGGCTGGCTTTCCTCTGGTCcttccctcc
ssc-mir-185 ---ggtgagggatTGGAGAGAAAGGCAGTTCCTGAtggtcccctccccaggggctggctttcctctggtccttccctcc
cfa-mir-185 -------------TGGAGAGAAAGGCAGTTCCTGAtggtcccctccccaggggctggctttcctctggt----------
mml-mir-185 gggcgcgagggatTGGAGAGAAAGGCAGTTCCTGAtggtcccctcctcaggggctggctttcctctggtccttccctcc
ptr-mir-185 gggggcgagggatTGGAGAGAAAGGCAGTTCCTGAtggtcccctccccaggggctggctttcctctggtccttccctcc
mmu-mir-185 -------agggatTGGAGAGAAAGGCAGTTCCTGAtggtcccct-cccAGGGGCTGGCTTTCCTCTGGTcctt------
rno-mir-185 gggggtgagggatTGGAGAGAAAGGCAGTTCCTGAtggtcccct-cccaggggctggcTTTCCTCTGGTCCTTCTCTcc
128216_6 AGGGGCTGGCTTTCCTCTGGT 761,725,36,21,20,1,3
754606_1 CAGGGGCTGGCTTTCCTCTGGT 849,810,39,22,21,1,3
cluster#=31 referenceSeqID=hsa-mir-143 reads#=2 mir#=7
hsa-mir-143 gcgcagcgccctgtctcccagcctgaGGTGCAGTGCTGCATCTCTGGTcagttgggagtcTGAGATGAAGCACTGTAGCTCaggaagagagaagttgttctgcagc
hsa-mir-4770 ---------------------gagttatggggtcatctatccttcccttggaaaatgatcTGAGATGA--CACTGTAGCTc-------------------------
mml-mir-143 gcgcagcgccgtgtctcccagcctgaggtgcagtgctgcatctctggtcagttgggagtcTGAGATGAAGCACTGTAGCTCaggaagagagaagttgttctgcagc
ppa-mir-143 gcgcagcgccctgtctcccagcctgaggtgcagtgctgcatctctggtcagttgggagtcTGAGATGAAGCACTGTAGCTCAggaagagagaagtttttctgcagc
mmu-mir-143 ---------------------cctgaGGTGCAGTGCTGCATCTCTGGtcagttgggagtcTGAGATGAAGCACTGTAGCTCagg----------------------
rno-mir-143 gcggagcgcc-tgtctcccagcctgaGGTGCAGTGCTGCATCTCTGGtcagttgggagtcTGAGATGAAGCACTGTAGCTCAggaagggagaagatgttctgcagc
eca-mir-143 --------------------gcccgaggtgcagtgctgcatctctggtcagttgggagtcTGAGATGAAGCACTGTAGCTCagg----------------------
406642_2 TGAGATGACACTGTAGCTC 715,417,298,19,11,8,3
cluster#=32 referenceSeqID=oar-mir-376c reads#=5 mir#=9
oar-mir-376c atccttctttggtatttaaaagGTGGATATTCCGTCTATGTTTatgttatttatggttaAACATAGAGGAAATTCCACGTtttcagtatcaaatgctgcttggaa
bta-mir-376c -------tttggtatttaaaagGTGGATATTCCTTCTATGTTTAtgttatttgtggttaaacatagaggaaattccacgttttcagtatcaaa------------
bta-mir-376b ----ttctttggtatttaaaagGTGGATATTCCTTCTATGTTTAcgtgattcatagataATCATAGAGGAAAATCCATGTTttcagtatcaaatgct--------
ssc-mir-376c ------------tatttaaaagGTGGATATTCCTTCTATGTTTAtgttatttgtggttaaacatagaggaaattccacgttttcagtatc---------------
ssc-mir-376b ------------tatttaaaagGTGGCTATTCCTTCTATGTTTAtgttatttgtggttaaacatagaggaaattccacgttttcagtatc---------------
cfa-mir-376c -------tttggtatttaaaagGTGGATATTCCTTCTATGTTTAtgttatttatggttaaacatagaggaaattccacgttttcagtatcaaa------------
cfa-mir-376b gtctttctttggtatttaaaagGTGGATATTCCTTCTATGTTTAcgtgattcatagataATCATAGAGGAAAATCCATGTTttcagtatcaaatgctg-------
mmu-mir-376c -------tttggtatttaaaagGTGGATATTCCTTCTATGTTTAtgctttttgtgattaAACATAGAGGAAATTTCACGTtttcagtgtcaaa------------
rno-mir-376c --------ttggtatttaaaagGTGGATATTCCTTCTATGTTTatggtatttatgattaAACATAGAGGAAATTTCACGTtttcagtgtcaa-------------
1071386_1 GTGGCTATTCCTTCTATGTTT 725,689,36,21,20,1,5
1509507_1 GGTGGCTCTTCCTTCTATGTTT 644,621,23,22,21,1,5
564825_1 GGTGGCTGTTCCTTCTATGTTT 440,433,7,22,21,1,5
630742_1 AACATAGAGGAACTTTCACGT 626,614,12,21,20,1,3
1241763_1 AACATAGAGGAAATATCACGT 508,500,8,21,20,1,3
cluster#=33 referenceSeqID=bta-mir-105a reads#=77 mir#=7
bta-mir-105a tgtgcatcgtagTCAAATGCTCAGACTCCTGTGGTggctgctcatgcaccacggatgtttgagcatgtgctacggtgtcta
bta-mir-105b tgtgcatcgtggTCAAATGCTCAGACTCCT-TGGTggctgcttatgcaccatggatgtttgagcatgtgctatggtgtcta
hsa-mir-105-1 tgtgcatcgtggTCAAATGCTCAGACTCCTGTGGTggctgctcatgcaccACGGATGTTTGAGCATGTGCTAcggtgtcta
hsa-mir-105-2 tgtgcatcgtggTCAAATGCTCAGACTCCTGTGGTggctgcttatgcaccACGGATGTTTGAGCATGTGCTAtggtgtcta
ssc-mir-105-2 tgtgcatcgtggTCAAATGCTCAGACTCCT-TGgtggctgcttatgcaccacggatgtttgagcatgtgctatggtgtcta
cfa-mir-105b tgtgcatcatggTCAAATGCTCAGACTCCT-TGgtggctgcttatgcaccatgaatgtttgagcatgtgctatggtgtcta
eca-mir-105 tgtgcatcgtagTCAAATGCTCAGACTCCTGTGGTggccgttcatgcaccacggatgtttgagcatgtgctatggtgtcta
26200_42 TCAAATGCTCAGACTCCTTGGT 828,716,112,22,19,3,5
40090_25 TCAAATGCTCAGACTCCTTGGTG 872,723,149,23,19,4,5
139354_6 TCAAATGCTCAGACTCCTTGG 832,754,78,21,19,2,5
802516_2 AAATGCTCAGACTCCTTGGTG 670,537,133,21,17,4,5
1245838_1 TCAACTGCTCAGACTCCTTGGTG 688,564,124,23,18,5,5
959202_1 CAAATGCTCAGACTCCTTGGT 553,490,63,21,18,3,5
cluster#=34 referenceSeqID=bta-mir-653 reads#=3 mir#=7
bta-mir-653 tcattccctcaGTGTTGAAACAATCTCTGTTGaaccatgttacaggaagttcactggagtttgtttcaacattggaggaatgataagatg
hsa-mir-653 tcattccttcaGTGTTGAAACAATCTCTACTGaaccagcttcaaacaagttcactggagtttgtttcaatattgcaagaatgataagatg
cfa-mir-653 tcattccttcaGTGTTGAAACAATCTCTATTGaaccaggctccaaaaagttcactggagtttgtttcaatattgcaagaatgataagat-
mml-mir-653 tcattccttcaGTGTTGAAACAATCTCTACTGaaccagcttcaaacaaattcactggagtttgtttcaatattgcaagaatgataagatg
ptr-mir-653 tcattccttcaGTGTTGAAACAATCTCTACTGaaccagcttcaaacaagttcactggagtttgtttcaatattgcaagaatgataagatg
mmu-mir-653 -cattctttcaGTGTTGAAACAATCTCTACTGaaccaagctaaagcgagTTCACTGGAGTTTGTTTCAGTattgcaggagtgct------
eca-mir-653 tcattccttcaGTGTTGAAACAATCTCTGCTGaaccaggctaaactacgttcactggagtttgtttcaatattgcaagaatga-------
265739_2 TTGAAACAATCTCTACTGAACC 875,835,40,22,21,1,5
1163543_1 TTGAAACAATCTCCGCTGAAC 548,525,23,21,20,1,5
cluster#=35 referenceSeqID=bta-mir-21 reads#=3 mir#=7
bta-mir-21 tgtcgggTAGCTTATCAGACTGATGTTGACTgttgaatctcatggcAACAGCAGTCGATGGGCTGTCTgaca
hsa-mir-21 tgtcgggTAGCTTATCAGACTGATGTTGActgttgaatctcatggCAACACCAGTCGATGGGCTGTctgaca
ssc-mir-21 tgtcgggTAGCTTATCAGACTGATGTTGActgttgaatctcatggcaacagcagtcgatgggctgtctgaca
cfa-mir-21 -------TAGCTTATCAGACTGATGTTGActgttgaatctcatggcaacagcagtcgatgggctgtc-----
mdo-mir-21 tgtcggaTAGCTTATCAGACTGATGTTGActgttggatctcatggcaacagcagtcgatgagctgtctgaca
oan-mir-21 tatcggaTAGCTTATCAGACTGATGTTGActgttagatctcctggCAACAGCAGTCGATGGGCTGTCtgaca
mmu-mir-21 tgtcggaTAGCTTATCAGACTGATGTTGActgttgaatctcatggCAACAGCAGTCGATGGGCTGTCtgaca
1402649_1 ATAGCTTATCAGCCTGATGTTGA 725,709,16,23,22,1,5
1580776_1 CAACACCAGTCGCTGGGCTGT 712,702,10,21,20,1,3
797556_1 CAACACCAGTCGACGGGCTGT 354,352,2,21,20,1,3
cluster#=37 referenceSeqID=oar-mir-376d reads#=2 mir#=9
oar-mir-376d gggatccatcctgtttggtatttaaaaggtagattttccttctatggttacgggtttggtgattaATCATAGAGGAAAATCCACATtttcagtatcaaatgctgctttgg
bta-mir-376d ----------------ggtatttaaaaggtagattttccttctatgattacgggtttggtgattaATCATAGAGGAAAATCCACATtttcggtatcaa------------
hsa-mir-376a-2 ----------------ggtatttaaaaggtagattttccttctatggttacgtgtttgatggttaATCATAGAGGAAAATCCACGTtttcagtatc--------------
hsa-mir-376a-1 ----------------------taaaagGTAGATTCTCCTTCTATGAGTAcattatttatgattaATCATAGAGGAAAATCCACGTtttc--------------------
cfa-mir-376a-2 ----------------------------gtagattttccttctatgattacgtgtttgatggttaATCATAGAGGAAAATCCACGT------------------------
cfa-mir-376a-3 ---------------------------ggtggatgttccttctatgtttacgggatttatagttaATCATAGAGGAAAATCCACGT------------------------
cfa-mir-376a-1 ----------------------------gtagattctccttctatgagtacattatttatgattaATCATAGAGGAAAATCCACGT------------------------
ptr-mir-376a-2 -----------------gtatttaaaaggtagattttccttctatggttacgtgtttgatggttaATCATAGAGGAAAATCCACGTtttcagtatc--------------
ptr-mir-376a-1 -----------------------aaaaggtagattctccttctatgagtacattatttatgattaATCATAGAGGAAAATCCACGTtttc--------------------
1744638_1 GGGGGATGTTCCTTCTATGTTT 584,578,6,22,21,1,5
564825_1 GGTGGCTGTTCCTTCTATGTTT 440,436,4,22,21,1,5
cluster#=38 referenceSeqID=oar-mir-376c reads#=2 mir#=6
oar-mir-376c atccttctttggtatttaaaagGTGGATATTCCGTCTATGTTTatgttatttatggttaAACATAGAGGAAATTCCACGTtttcagtatcaaatgctgcttggaa
hsa-mir-376c -----------------aaaaggtggatattccttctatgtttatgttatttatggttaAACATAGAGGAAATTCCACGTttt----------------------
ptr-mir-376c ------------------aaaggtggatattccttctatgtttatgttatttatggttaAACATAGAGGAAATTCCACGTttt----------------------
mmu-mir-376c -------tttggtatttaaaagGTGGATATTCCTTCTATGTTTAtgctttttgtgattaAACATAGAGGAAATTTCACGTtttcagtgtcaaa------------
rno-mir-376c --------ttggtatttaaaagGTGGATATTCCTTCTATGTTTatggtatttatgattaAACATAGAGGAAATTTCACGTtttcagtgtcaa-------------
eca-mir-376c -----------------aaaaggtggatattccttctatgtttatgttgtttatggttaAACATAGAGGAAATTCCACGTttt----------------------
630742_1 AACATAGAGGAACTTTCACGT 626,614,12,21,20,1,3
1241763_1 AACATAGAGGAAATATCACGT 508,500,8,21,20,1,3
cluster#=39 referenceSeqID=hsa-mir-516a-2 reads#=1 mir#=15
hsa-mir-516a-2 tctcaggttgtgaccTTCTCGAGGAAAGAAGCACTTTCtgttgtctgaaagaaaagaaagTGCTTCCTTTCAGAGGGTtacggtttgaga
hsa-mir-516a-1 tctcaggctgtgaccTTCTCGAGGAAAGAAGCACTTTCtgttgtctgaaagaaaagaaagTGCTTCCTTTCAGAGGGTtacggtttgaga
hsa-mir-516b-1 tctcaggctgtgaccATCTGGAGGTAAGAAGCACTTTctgttttgtgaaagaaaagaaagTGCTTCCTTTCAGAGGGTtactctttgaga
hsa-mir-520c tctcaggctgtcgtcCTCTAGAGG---GAAGCACTTTCTGttgtctgaaagaaaagAAAGTGCTTCCTTTTAGAGGGttaccgtttgaga
hsa-mir-516b-2 tctcatgatgtgaccATCTGGAGGTAAGAAGCACTTTgtgttttgtg-----aaagaaagTGCTTCCTTTCAGAGGGTtactctttgaga
hsa-mir-520b ----------------ccctctacagggaagcgctttctgttgtctgaaagaaaagAAAGTGCTTCCTTTTAGAGGG-------------
mml-mir-519a -ctcaggctgtgaccctctagagg---gaagcgctttctgtggtctgaaagaaaagAAAGTGCTTCCTTTTAGAGGGTTACcgtttgag-
ptr-mir-516a-2 -ctcaggttgtgaccttctcgaggaaagaagcactttctgttgtctgaaagaaaagaaagTGCTTCCTTTCAGAGGGTtacggtttgaga
ptr-mir-516a-1 -ctcaggctgtgaccttctcgaggaaagaagcactttctgttgtctgaaagaaaagaaagTGCTTCCTTTCAGAGGGTtacggtttgaga
ptr-mir-516b-1 -ctcagactgtgaccATCTGGAGGTAAGAAGCACTTTctgttttgtgaaagaaaagaaagTGCTTCCTTTCAGAGGGTtactctttgaga
ptr-mir-516b-2 -ctcatgatgtgaccATCTGGAGGTAAGAAGCACTTTgtgttttgtgaaagaaaagaaagTGCTTCCTTTCAGAGGGTtactctttgaga
ptr-mir-520c -ctcaggctgtcgtccTCTAGAGG---GAAGCACTTTCTGTtgtctgaaagaaaagAAAGTGCTTCCTTTTAGAGGGttaccgtttgaga
ptr-mir-520b -----------------cctctacagggaagcgctttctgttgtctgaaagaaaagAAAGTGCTTCCTTTTAGAGGG-------------
ppy-mir-520c tctcaggctgtgatcCTCT---GGAAGGAAGCACTTTCTGttgtctgaaagaaaagaAAGTGCTTCCTTTTAGAGGGTTaccgtttgaga
ppy-mir-520f tctcaggctgtgaccctctaaagg---gaagcactttctgtggtcagaaagaaaagcAAGTGCTTCCTTTTAGAGGGTTaccgtttggga
1904741_1 ATCTGGAGGTAAGAAGCACTTTCT 954,914,40,24,23,1,5
cluster#=40 referenceSeqID=bta-mir-25 reads#=1 mir#=6
bta-mir-25 ggccagtgttgagaggcggagacttgggcaattgctggacgctgccccgggCATTGCACTTGTCTCGGTCTGAcagtgccggcc
hsa-mir-25 ggccagtgttgagAGGCGGAGACTTGGGCAATTGctggacgctgccctgggCATTGCACTTGTCTCGGTCTGAcagtgccggcc
cfa-mir-25 -------------aggcggagacttgggcaattgctggacgctg-cccgcgCATTGCACTTGTCTCGGTCTGA-----------
mdo-mir-25 ggccagtgttgagaggcggagacttgggcaattgctgaactctgccctgggCATTGCACTTGTCTCGGTCTGAcagtgctggc-
ptr-mir-25 ggccagtgttgagaggcggagacttgggcaattgctggacgctgccctgggCATTGCACTTGTCTCGG-CTGAgagcgcccgcc
rno-mir-25 ggccagtgttgagAGGCGGAGACACGGGCAATTGCtggacgctgccctgggCATTGCACTTGTCTCGGTCTGAcagtgccggcc
1976864_1 CATTGCACTTGTCTCGGCTGA 673,555,118,21,17,4,3
cluster#=41 referenceSeqID=oar-mir-299 reads#=3 mir#=6
oar-mir-299 tgccatcgtgcggtacttgaagaaaTGGTTTACCGTCCCACATACATtctgaatatgTATGTGGGACGGTAAACCGCTTcttggtatcctgcccagccatcaaa
hsa-mir-299 -------------------aagaaaTGGTTTACCGTCCCACATACATtttgaatatgTATGTGGGATGGTAAACCGCTTctt----------------------
mml-mir-299 -------------------aagaaaTGGTTTACCGTCCCACATACATtttcaatatgTATGTGGGACGGTAAACCGCTTctt----------------------
ppy-mir-299 -------------------aagaaaTGGTTTACCGTCCCACATACATtttgaatatgTATGTGGGACGGTAAACCGCTTctt----------------------
rno-mir-3563 gatggctgggctggataccaagaagCGGTTTACCGTCCCACATACatactcaaaatgTATGTGGGACGGTAAACcatttcttcaagtaccgcgtgacagcaggg
eca-mir-299 -------------------aagaaatggtttaccgtcccacatacattttgagtatgTATGTGGGATGGTAAACCGCTTctt----------------------
1911750_1 TATGTGGGACGGTAAACCAT 758,720,38,20,19,1,3
1491102_1 TATGTGGGATCGTAAACCGCT 537,526,11,21,20,1,3
1825590_1 TGTATGTGGGCTGGTAAACCGC 522,509,13,22,21,1,3
cluster#=42 referenceSeqID=hsa-mir-1233-2 reads#=2 mir#=7
hsa-mir-1233-1 gtgagtgggaggccagggcacggcagggggagctgcagggctatgggaggggccccagcgtcTGAGCCCTGTCCTCCCGCAG
hsa-mir-1233-2 gtgagtgggaggccagggcacggcagggggagctgcagggctatgggaggggccccagcgtcTGAGCCCTGTCCTCCCGCAG
mml-mir-1233 gtgagtgggaggccagggcagggcagggggagctgcagggccttcggaggggccccagcgtcTGAGCCCTGTCCTCCCGCAG
ptr-mir-1233-2 gtgagtgggaggccagtgcacggcagggggagctgcagggccgtcggaggggccccagcgtcTGAGCCCTGTCCTCCCGCAG
ptr-mir-1233-1 gtgagtgggaggccagggcatggcagggggagctgcagggccgtcggaggggccccagcatcTGAGCCCTGTCCTCCCGCAG
ptr-mir-1233-3 -tgagtgggaggc-agtgcacggcagggggagctgcagggccgtcggaggggccccagcgtcTGAGCCCTGTCCTCCCGCAG
ppy-mir-1233 gtgagtgggagaccagggcacggcagggggagctgcagggctgtgggaggggccccagcgtcTGAGCCCTTTCCTCCCGCAG
1422563_1 CAGGGGGAGCTGCAGCCC 506,490,16,18,16,2,5
1407826_1 AGGGCTGTGGGAGGAG 565,544,21,16,15,1,3
cluster#=44 referenceSeqID=bta-mir-15a reads#=2 mir#=5
bta-mir-15a ccttggagtaaagTAGCAGCACATAATGGTTTGTggattttgaaaaggtgcaggccatattgtgctgcctcaaaaatacaagg
ssc-mir-15a --ttggagtaaagTAGCAGCACATAATGGTTTGTggattttgaaaaggtgcaggccatattgtgctgcctcaaaaatacaa--
cfa-mir-15a -------------TAGCAGCACATAATGGTTTGTggattttgaaaaggtgcaggccatattgtgctgcctca-----------
mdo-mir-15a ccttggggtaaagTAGCAGCACATAATGGTTTGTTggttttgaaaaggtgcaggccatattgtgctgcctcaaaaatacaagg
oan-mir-15a ccttggggtaaagTAGCAGCACATAATGGTTTGTgagttttgaaa---taCAGGCCATATTGTGCTGCCTCAaaaatacaagg
326032_2 TAGCAGCACCTAATGGTTTGTGA 721,705,16,23,22,1,5
cluster#=45 referenceSeqID=oar-mir-377 reads#=1 mir#=5
oar-mir-377 aagaggtatcttggtgctcaggccctgctgacgtttgatccttgagcAGAGGTTGCCTTTGGTGAATTCgctttatttatgttgaATCACACAAAGGCAACTTTTGTttgagtatcaaatcctgcttggga
bta-mir-377 -----------------------------------------ttgagcagaggttgcccttggtgaattcgctttatttatgttgaATCACACAAAGGCAACTTTTGTttg---------------------
ptr-mir-377 ------------------------------------------tgagcagaggttgcccttggtgaattcgctttatttatgttgaATCACACAAAGGCAACTTTTGTttg---------------------
mmu-mir-377 ------------------------------------------tgagcAGAGGTTGCCCTTGGTGAATTCgctttattgatgttgaATCACACAAAGGCAACTTTTGTttg---------------------
rno-mir-377 ----------------------------------------cttgagcAGAGGTTGCCCTTGGTGAATTCgctttattgatgtTGAATCACACAAAGGCAACTTTTggttgag-------------------
516475_1 AGAGGTTGCCCTTTGTATATTCG 77,71,6,23,20,3,5
cluster#=46 referenceSeqID=hsa-mir-664 reads#=10 mir#=5
hsa-mir-664 gaacattgaaACTGGCTAGGGAAAATGATTGGATagaaactattattcTATTCATTTATCCCCAGCCTACAaaatgaaaaaa
ssc-mir-664 gaacattgaaaCAGGCTAGGAGAAGTGATTGGATagaaaatggtattcTATTCATTTATCCCCAGCCTACAaaaagaaa---
ptr-mir-664 gaacattgaaactggctagggaaaatgattggatagaaactattattcTATTCATTTATCCCCAGCCTACAaaatgaaaaa-
ppy-mir-664 gaacattgaaactggctagggaaagtgattggatagaaactattattcTATTCATTTATCCCCAGCCTACAaaatgaaaaaa
eca-mir-664 gaacattgaaacaggctaggaaaactgattggatagaaaatattactcTATTCATTTATCCCTAGCCTACAaa---------
118899_6 TATTCATTTATCTCCTAGCCTACA 823,555,268,24,16,8,3
299440_2 TTCATTTATCTCCCAGCCTACAAAAA 1000,623,377,26,16,10,3
384116_2 TTCATTTATCTCCTAGCCTACA 819,527,292,22,14,8,3
cluster#=47 referenceSeqID=oar-mir-379 reads#=369 mir#=5
oar-mir-379 cctgattctggggtcagcaccactccacggttcctgcagagaTGGTAGACTATGGAACGTAGGCtgtgtgatttctgaccTATGTAACACGGTCCACTAACTctcagtatccaatccgtcctcgga
oar-mir-411b -------------------ccatttcgctgtatgtggagagaTGGTCGACCATAAAACGTACG---TgtgctttatgacgTATGTAACATGGTCCACTAATtctcagcatcagtcagcctgagg--
hsa-mir-379 -------------------------------------agagaTGGTAGACTATGGAACGTAGGcgttatgatttctgaccTATGTAACATGGTCCACTAACTct----------------------
mmu-mir-379 -------------------------------------agagaTGGTAGACTATGGAACGTAGGcgttatg-tttttgaccTATGTAACATGGTCCACTAACTct----------------------
rno-mir-379 ---------------------------tggttcctgcagaggTGGTAGACTATGGAACGTAGGcgttatg-tttctgacCTATGTAACATGGTCCACTAACtctcagtatcca-------------
5051_289 TGGTAGACTATGGAACGTAGGCGT 898,860,38,24,23,1,5
27833_42 TGGTAGACTATGGAACGTAGGCGTT 965,926,39,25,24,1,5
113659_13 TGGTAGACTATGGAACGTAGGCCT 822,804,18,24,23,1,5
179656_3 GGTAGACTATGGAACGTAGGCGT 840,805,35,23,22,1,5
1960632_1 TGGTAGACTATGGAACGTAGGCGTTAT 976,938,38,27,26,1,5
1343947_1 TGGTAGACTATGGAATGTAGGCGTT 896,890,6,25,24,1,5
909607_1 TGGTAGACTATGGACCGTAGGCGT 849,838,11,24,23,1,5
759067_1 TGGTAGACTATGGAAGGTAGGCGT 827,820,7,24,23,1,5
1216030_1 TGGTAGACTATGGCACGTAGGCGT 788,777,11,24,23,1,5
1033467_1 TGGTAGACTATGGAAAGTAGGCGTT 745,735,10,25,24,1,5
1390771_1 TGGGAGACTATGGAACGTAGGCGT 704,686,18,24,23,1,5
1983471_1 NGGTAGACTATGGAACGTAGGCGT 473,469,4,24,23,1,5
232613_3 TATGTAACATGGTCCCCTAAT 724,711,13,21,20,1,3
181140_3 NATGTAACATGGTCCACTAAT 408,403,5,21,20,1,3
1580606_1 TATGTAACATGGTCCTCTAAT 767,759,8,21,20,1,3
2008379_1 TATGTATCATGGTCCACTAAT 772,757,15,21,20,1,3
1142358_1 TATGTAATATGGTCCACTAAT 739,721,18,21,20,1,3
1742999_1 TATGTAACATGGTCCNCTAAT 715,708,7,21,20,1,3
1098238_1 TATGTACCATGGTCCACTAAT 644,632,12,21,20,1,3
448987_1 TATGTAACATGGCCCACTAAT 623,608,15,21,20,1,3
2019794_1 TATGTAACATGGTACACTAAT 625,602,23,21,20,1,3
1960151_1 TATGTAACATGGGCCACTAAT 584,574,10,21,20,1,3
cluster#=48 referenceSeqID=mml-mir-503 reads#=1 mir#=4
mml-mir-503 tgcccTAGCAGCGGGAACAGTTCTGCAGtgagtgatcagtactctggagtattgtttccgctgccagggta
ptr-mir-503 tgcccTAGCAGCGGGAACAGTTCTGCAGtgagcgatcggtgctctggagtattgtttccgctgccagggt-
ppy-mir-503 tgcccTAGCAGCGGGAACAGTTCTGCAGtgagcgattggtgctctggagtattgtttccgctgccagggta
rno-mir-503 tgcccTAGCAGCGGGAACAGTACTGCAGtgagtgtttggtgccctGGAGTATTGTTTCCGCTGCCTGGgta
1101219_1 GGAGTATTGTTCCCGCTGCCT 598,581,17,21,20,1,3
cluster#=49 referenceSeqID=bta-mir-1224 reads#=5 mir#=4
bta-mir-1224 GTGAGGACTCGGGAGGTGGAGggtggcgctgccagggccagggcactgtctcagctcgcttctccccccacctcctctctcctcag
hsa-mir-1224 GTGAGGACTCGGGAGGTGGagggtggtgccgccggggcc-gggcgctgtttcagctcgcttctccCCCCACCTCCTCTCTCCTCAG
mml-mir-1224 GTGAGGACTCGGGAGGTGGagggtggcgccgccggggccagg-cgctgtctaagctcgcttctccCCCCACCTCCTCTCTCCTCAG
ppy-mir-1224 GTGAGGACTCGGGAGGTGGagggtggcgccgccggggcc-gggcgctgtctcagctcgcttctccCCCCACCTCCTCTCTCCTCAG
174680_4 GCCGGGGCCGGGCGC 574,385,189,15,10,5,5
934843_1 CGCCGGGGCCGGGCG 503,329,174,15,10,5,5
cluster#=50 referenceSeqID=mdo-mir-101-1 reads#=4 mir#=5
mdo-mir-101-1 aggctgccctggctcagttatcacagtgctgatgctgtccgttctcaaggTACAGTACTGTGATAACTGAAGgatggcagcca
mdo-mir-101-2 --actgtcctttttcggttatcatggtaccgatgctgtatatgtgaaaggTACAGTACTGTGATAACTGAAGaatggtggt--
mmu-mir-101b gaactgcccttttTCGGTTATCATGGTACCGATGCTgtagctctgaaaggTACAGTACTGTGATAGCTGAAgaatggcggtgc
mmu-mir-101c --------tgatgccctactgcacagtcctg-tgatgactgtgctcaacgcACAGTACTGTGATAACTGAtcgcctaactg--
rno-mir-101b gaactgtccttttTCGGTTATCATGGTACCGATGCtgtagatctgaaaggTACAGTACTGTGATAGCTGAAgaatggtggtgc
1260139_1 CACAGTACTGTGATAACTGAT 833,793,40,21,20,1,3
1724500_1 GCACAGTACTGTGATAACTGAT 777,743,34,22,21,1,3
1785188_1 NCACAGTACTGTGATAACTGA 551,543,8,21,20,1,3
2018371_1 GCACAGTAATGTGATAACTGA 488,484,4,21,20,1,3
cluster#=51 referenceSeqID=hsa-mir-300 reads#=1 mir#=3
hsa-mir-300 tgctacttgaagagaggtaatccttcacgcatttgctttacttgcaatgatTATACAAGGGCAGACTCTCTCTggggagcaaa
ptr-mir-300 -gctacttgaagagaggtaatccttcatgcatttgctttacttgcaatgatTATACAAGGGCAGACTCTCTCTggggagcaaa
ppy-mir-300 tgctacttgaagagaggtaatccttcatgcatttgctttacttgcaatgatTATACAAGGGCAGACTCTCTCTggggagcaaa
523113_1 TATACAAGGGCAGTCTCTCTGC 197,191,6,22,19,3,3
cluster#=52 referenceSeqID=hsa-mir-646 reads#=1 mir#=3
hsa-mir-646 gatcaggagtctgccagtggagtcagcacacctgcttttcacctgtgatcccaggagaggAAGCAGCTGCCTCTGAGGCctcaggctcagtggc
ptr-mir-646 -atcaggagtctgccagtggagtcagcacacctgcttttcacctgtgatcccaggagaggAAGCAGCTGCCTCTGAGGCctcaggctcagtgg-
ppy-mir-646 gatcaggagtctgccactggagtcggcacgcctgcttttcagctgtgatcccagaagaggAAGCGGCTGCCTCTGAGGCctcaggctcagt---
843740_1 TGCCACTGAGGCCTCAGAGCAGA 77,63,14,23,16,7,3
cluster#=53 referenceSeqID=oar-mir-370 reads#=21 mir#=3
oar-mir-370 agtctggggcacaaggcagagaagcCAGGTCACGTCTCTGCAGTTACaccgctctcgagtGCCTGCTGGGGTGGAACCTGGTATgtctgtctgtctagcaccacagc
mmu-mir-370 -------------agacggagagacCAGGTCACGTCTCTGCAGTTacacagctcatgagtGCCTGCTGGGGTGGAACCTGGTttgtctgtct---------------
rno-mir-370 -------------agacagagagacCAGGTCACGTCTCTGCAGTTACACagctcatgagtGCCTGCTGGGGTGGAACCTGGTttgtctgtct---------------
118585_6 GCCTGCTGGGGTGGACCCTGGTT 745,725,20,23,22,1,3
204185_4 GCCTGCTGGGGCGGAACCTGGTT 704,687,17,23,22,1,3
179932_3 GCCTGCTGGGGTGGATCCTGGTTT 828,812,16,24,23,1,3
1725959_2 GCCTGCTGGGGTGGATCCTGGTT 828,810,18,23,22,1,3
1626360_2 GCCTGCTGGGGCGGAACCTGGTTT 752,735,17,24,23,1,3
306296_2 TCCTGCTGGGGTGGAACCTGGTTT 669,647,22,24,23,1,3
950377_1 GCCTGCTGGGGTGGAACCTGGCT 792,774,18,23,22,1,3
1475653_1 GCCGGCTGGGGTGGAACCTGGTTT 686,666,20,24,23,1,3
cluster#=54 referenceSeqID=mml-mir-486 reads#=1 mir#=3
mml-mir-486 gtaTCCTGTACTGAGCTGCCCCGAGctgggcagcatgaagggcctCGGGGCAGCTCAGTACAGGATgc
mmu-mir-3107 gcaTCCTGTACTGAGCTGCCCCGAGctgagcacagtgaaggacctCGGGGCAGCTCAGTACAGGAccc
mmu-mir-486 gggTCCTGTACTGAGCTGCCCCGAGgtcctcactgtgctcagc-tCGGGGCAGCTCAGTACAGGATgc
1561733_1 TCCTGTACTGAGCTGCCCCGCGGT 851,832,19,24,23,1,5
cluster#=55 referenceSeqID=hsa-mir-663b reads#=3 mir#=3
hsa-mir-663b ggtgccgagggccgtccggcatcctaggcgggtcgctgcggtacctccctcctgtctgtggcggtgggatcccgtggccgtgttttcctGGTGGCCCGGCCGTGCCTGAGGtttc
ptr-mir-663b ggtgccgagggccgtccggcatcctaggcgggtcgctgtgggaccgccctcgtgtctgtggcggtgggatcctgtggccgtgttttcctGGTGGCCCGGCCGTGCCTGAGGttt-
ppy-mir-663b --tgccgagggccatccggcatcctagatggggagccgtgggacctccctcgtgcctgtggtggtgggatcccatggcagtgttttcctGGTGGCCCGGCCGTGCCTGAGGtttc
450858_3 GGCCCGGCCGTGCCGGCGGG 265,259,6,20,17,3,3
cluster#=56 referenceSeqID=ssc-mir-2476-2 reads#=3 mir#=3
ssc-mir-2476-2 aaaccagagcTCCCTGTGGTCTAGTGGTTAGaattcagcattttcactgctggtctggggactgagat
ssc-mir-2476-3 aactgggagtTCCCTGTGGTCTAGTGGTTAGaatttggcacttgcactgctatggcccaggtttgatc
ssc-mir-2476-1 ttaggggagtTCCCTGTGGTCTAGTGGTTAGgacttggcactttcaccattccgccctgggttcaatc
1643520_1 TCCCTGTGGTCTAGTGGTTAGGATTTGGC 970,959,11,29,28,1,5
620683_1 TCCCTGTGGTCTAGTGGTTAGGATTTGG 966,948,18,28,27,1,5
1937269_1 TGGTCTAGTGGTTAGGATTTGGC 713,691,22,23,22,1,5
cluster#=57 referenceSeqID=bta-mir-502a-2 reads#=11 mir#=4
bta-mir-502a-2 ctgctctgttcccctgtatccaatcttaatgcccagatgcaggtactgtctcagtgcAATGCACCTGGGCAAGGATTCAcagaagataag
bta-mir-502a-1 -------tgcccacccctctaatccttgctctctgggtgctagtgctgtctccatgcAATGCACCTGGGCAAGGATTCAgagagggtggg
hsa-mir-501 -------gctcttcctctctAATCCTTTGTCCCTGGGTGAGAgtgctttctgaatgcAATGCACCCGGGCAAGGATTCTgagagggtgag
ptr-mir-501 --------ctcttcctctctaatcctttgtccctgggtgagagtgctttctgaatgcAATGCACCCGGGCAAGGATTCTgagagggtgag
223306_3 TAATCCTTGCTCTCTGGGTGCT 859,820,39,22,21,1,5
385440_2 TAATCCTTGCTCTCTGGGTGCTAGTGC 1070,1030,40,27,26,1,5
284719_2 TAATCCTTGCTCTCTGGGTGCTAGT 959,919,40,25,24,1,5
748756_1 TAATCCTTGCTCTCTGGGTGCTA 763,728,35,23,22,1,5
733807_1 CTAATCCTTGCTCTCTGGGTGCTAGT 736,717,19,26,25,1,5
967266_1 CTAATCCTTGCTCTCTGGGTGCT 749,711,38,23,22,1,5
1251702_1 ATGTACCCGGGCAAGGATTCTG 562,552,10,22,21,1,3
cluster#=58 referenceSeqID=bta-mir-2284k reads#=369 mir#=2
bta-mir-2284k agttgaccaGAAAAGTTCGGTCGGGTTTTTctgcaacatctaatgaaaaaaccaaaagaactttttggccacct
bta-mir-2284x gatttagtattgggttggcTGAAAAGTTCGTTCGGGTTTTtccataagaactcaaataaactttttggccaacc
36787_28 TGAAAAGTTCGTTCGCGTTTTT 759,743,16,22,21,1,5
44165_22 TGAAAAGTTCGTTCGAGTTTTT 762,746,16,22,21,1,5
31122_35 NGAAAAGTTCGTTCGGGTTTTT 473,467,6,22,21,1,5
44929_23 GAAACGTTCGTTCGGGTTTTT 652,638,14,21,20,1,5
56836_20 TGAAACGTTCGTTCGGGTTTTT 687,670,17,22,21,1,5
69282_16 TGAACAGTTCGTTCGGGTTTTT 709,696,13,22,21,1,5
58403_16 GAAACGTTCGTTCGGGTTTTTC 695,679,16,22,21,1,5
63839_14 TGAAAAGTTCGTTCGTGTTTTT 736,722,14,22,21,1,5
80035_11 TGAAACGTTCGTTCGGGTTTT 662,646,16,21,20,1,5
80423_10 GAAAAGTTCGTTCGGCTTTTTC 731,709,22,22,21,1,5
89607_9 GAAAAGTTCGTTCGGCTTTTT 723,706,17,21,20,1,5
87815_9 GAAAAGTTCGTTCGGATTTTT 704,689,15,21,20,1,5
102768_8 GAAAAGCTCGTTCGGGTTTTTC 770,758,12,22,21,1,5
108181_8 TGAAAAGCTCGTTCGGGTTTTT 703,682,21,22,21,1,5
76790_11 NGAAAAGTTCGTTCGGGTTTT 370,365,5,21,20,1,5
145467_5 GAAAAGTTCGTTCGGTTTTTT 733,709,24,21,20,1,5
129241_5 TGAAAGGTTCGTTCGGGTTTT 634,625,9,21,20,1,5
176947_4 TGAAAAGTCCGTTCGGGTTTTT 766,745,21,22,21,1,5
157258_5 TGAAAAGTTCGTTCGGGCTTT 609,593,16,21,20,1,5
162269_4 TGAAAAGTTCGTTCGGGCTTTT 706,690,16,22,21,1,5
147709_4 GAAAAGTTCGTTCGGATTTTTC 708,689,19,22,21,1,5
320619_4 GAAAAGCTCGTTCGGGTTTTT 694,684,10,21,20,1,5
151979_4 TGAACAGTTCGTTCGGGTTTT 670,659,11,21,20,1,5
165574_4 GAAAAGTTCGTTCGGTTTTT 677,656,21,20,19,1,5
344164_4 GAAAGGTTCGTTCGGGTTTTTC 638,629,9,22,21,1,5
278192_3 TGAAAAGTTCGTTCGGGTCTTT 772,754,18,22,21,1,5
170189_4 NGAAAAGTTCGTTCGGGTTTTTC 523,517,6,23,22,1,5
330359_3 TGCAAAGTTCGTTCGGGTTTTT 701,683,18,22,21,1,5
249379_3 GCAAAGTTCGTTCGGGTTTTT 677,666,11,21,20,1,5
216731_3 TGAAAAGGTCGTTCGGGTTTTT 673,658,15,22,21,1,5
397174_3 GAAATGTTCGTTCGGGTTTTT 652,642,10,21,20,1,5
331949_2 TGAAAAATTCGTTCGGGTTTTT 831,811,20,22,21,1,5
247322_2 TGAAATGTTCGTTCGGGTTTTT 788,764,24,22,21,1,5
342705_2 TGAAAAGTTCGTTCGNGTTTTT 742,735,7,22,21,1,5
351641_2 TGAAAAGTTCGTTCGCGTTTTTC 746,733,13,23,22,1,5
258602_2 GGAAAAGTTCGTTCGGGTTTTT 744,724,20,22,21,1,5
334657_2 TGAAAAGTTCGCTCGGGTTTTT 718,710,8,22,21,1,5
321539_2 GAAAAGNTCGTTCGGGTTTTTC 701,695,6,22,21,1,5
255687_2 GAACAGTTCGTTCGGGTTTTTC 705,688,17,22,21,1,5
275064_2 GAAAAGGTCGTTCGGGTTTTT 696,687,9,21,20,1,5
241613_2 TGAAAAGTTCGTTCGGGTTCTT 702,683,19,22,21,1,5
428481_2 TGAAAAGTTCGCTCGGGTTTT 686,675,11,21,20,1,5
408911_2 TGAAAAGTTCGTCCGGGTTTT 685,665,20,21,20,1,5
344336_2 TGAACAGTTCGTTCGGGTTTTTC 678,663,15,23,22,1,5
399233_2 GAAAAGATCGTTCGGGTTTTTC 651,642,9,22,21,1,5
257324_2 TGAAGAGTTCGTTCGGGTTTT 648,638,10,21,20,1,5
272869_2 TGAAAAGCTCGTTCGGGTTTT 645,631,14,21,20,1,5
272309_2 TGAAATGTTCGTTCGGGTTTT 608,598,10,21,20,1,5
260986_2 TGACAAGTTCGTTCGGGTTTTT 613,595,18,22,21,1,5
288013_2 GAAACGTTCGTTCGGGTTTT 573,565,8,20,19,1,5
1275842_1 GAAGAGTTCGTTCGGGTTTTTC 800,788,12,22,21,1,5
1069487_1 GAAAAGTTCGTTCGGTTTTTTC 774,758,16,22,21,1,5
1608133_1 GAAAAGTTCGTTCGGGTTGTTC 765,746,19,22,21,1,5
1946804_1 GAAAAGTTCGTTCGGNTTTTTC 743,736,7,22,21,1,5
1802265_1 TGAAAANTTCGTTCGGGTTTTT 729,723,6,22,21,1,5
1253707_1 TGAAAGGTTCGTTCGGGTTT 735,718,17,20,19,1,5
1387956_1 TGAAAANTTCGTTCGGGTTTT 722,716,6,21,20,1,5
560113_1 TGGAAAGTTCGTTCGGGTTTTTC 734,715,19,23,22,1,5
455517_1 TGAAAAGTTCGTTAGGGTTTT 697,679,18,21,20,1,5
496468_1 TCAAAAGTTCGTTCGGGTTTTT 689,677,12,22,21,1,5
1120982_1 TGAAAANTTCGTTCGGGTTTTTC 678,674,4,23,22,1,5
1991317_1 GAAAAGTTCGTTCGGNTTTTT 681,674,7,21,20,1,5
1983222_1 GAAAAGTTCGTTCGGATTTT 689,671,18,20,19,1,5
1290225_1 GAAGAGTTCGTTCGGGTTTTT 681,669,12,21,20,1,5
1802437_1 GAACAGTTCGTTCGGGTTTTT 663,651,12,21,20,1,5
2005741_1 TGAAAGGTTCGTTCGGGTTTTT 651,642,9,22,21,1,5
524021_1 GAAATGTTCGTTCGGGTTTT 641,632,9,20,19,1,5
1171841_1 GAAAAGTTCGTTCGGNTTTT 636,629,7,20,19,1,5
1005770_1 GAAAAGTTCGTTCGGACTTTT 643,623,20,21,19,2,5
1518655_1 TGAGAAGTTCGTTCGGGTTTT 630,619,11,21,20,1,5
1402308_1 GAAAAGTTCGTTCGCGTTTTTC 609,598,11,22,21,1,5
1677542_1 TGAAAAGTCCGTTCGGGTTTT 600,588,12,21,20,1,5
848471_1 GAAAAGCTCGTTCGGGTTTT 586,574,12,20,19,1,5
985206_1 TGAAAAGTTCGTCCGGGTTTTTC 553,542,11,23,22,1,5
1047087_1 TGAAAAGGTCGTTCGGGTTTTTC 546,540,6,23,22,1,5
1132555_1 GAATAGTTCGTTCGGGTTTTT 548,528,20,21,20,1,5
1875926_1 TGAAAAGATCGTTCGGGTTTTT 530,521,9,22,21,1,5
2028157_1 TGAAAAGGTCGTTCGGGCTTTT 530,507,23,22,20,2,5
443315_1 NGAAAAGTTCGTTCGGATTTTT 330,317,13,22,20,2,5
cluster#=59 referenceSeqID=hsa-mir-384 reads#=1 mir#=2
hsa-mir-384 tgttaaatcaggaattttaaacaattcctagacaatatgtataatgttcataagtcATTCCTAGAAATTGTTCATAatgcctgtaaca
ppy-mir-384 tgttaaatcaggaattgtaaacaattcctagacaatatgtataatgttcataagtcATTCCTAGAAATTTTTCATAatgcctgtaaca
526567_1 TAAACAATTCGTAGACGAC 302,296,6,19,16,3,5
cluster#=60 referenceSeqID=hsa-mir-661 reads#=1 mir#=2
hsa-mir-661 ggagaggctgtgctgtggggcaggcgcaggcctgagccctggtttcgggcTGCCTGGGTCTCTGGCCTGCGCGTgactttggggtggct
ptr-mir-661 ggagaggctgtgctgtggggcagacgcaggcctgagccctggtttcgggcTGCCTGGGTCTCTGGCCCACGCGTgaccttggggtggct
992437_1 NTCGGGCTGCCTGGGT 32,30,2,16,15,1,3
cluster#=61 referenceSeqID=bta-mir-2888-1 reads#=1 mir#=2
bta-mir-2888-1 cctctctccctgcagcatctcagggcactgtgtgacttgggtcgggGGTGGGGTGGGGGGGTTGG
bta-mir-2888-2 ----ggagggtgcctctaagcctcacttgtcctgcctgtcaaatggGGTGGGGTGGGGGGGTTGG
1816714_1 TAAGCCTCACTTGTCCTGCCTGTCAAATGGGG 1190,1150,40,32,31,1,5
cluster#=62 referenceSeqID=hsa-mir-23c reads#=14 mir#=2
hsa-mir-23c agtgactttccaggtgtcacacagtgagtggcataatcagagtacaatttgagtcatgcccatacATCACATTGCCAGTGATTACCCaaggaaagtgacg
ssc-mir-23a ------------------------cggctggggttcctggggatgggatttgctgcctgtcacaaATCACATTGCCAGGGATTTCCaatcgacc------
64550_13 ATCACATTGCCAGGGCTTTCCAAT 810,793,17,24,23,1,3
537134_1 ATCACATTGCCAGGGATTTCCCAT 694,679,15,24,23,1,3
cluster#=63 referenceSeqID=mmu-mir-703 reads#=4 mir#=2
mmu-mir-703 agactggttaatgataacaatgcatcatAAAACCTTCAGAAGGAAAGAAtgttgtggaccatttttttttgtgtgtggcagttttaagttattagttttcaaaatcagt
eca-mir-703 ---------------------------tAAAACCTTCAGAAGGAAAGAatgttgtggaccatttggttttttgtgtggcagtttta-----------------------
1102229_1 TAAAACCTTCAGAAGGAAAGGAGAATG 1040,885,155,27,23,4,5
796365_1 CAGAAGGAAAGGAGAATGTT 787,592,195,20,15,5,5
1922067_1 CAGAAGGAAAGGAGAATGTTTTGTGGACCA 1152,579,573,30,15,15,5
781490_1 AGAAGGAAAGGAGAAT 632,476,156,16,12,4,5
cluster#=64 referenceSeqID=cfa-mir-300 reads#=48 mir#=2
cfa-mir-300 gctacTTGAAGAGAGGTTATCCTTCGTgtgtttgtatgattgtaatgaatatgcaaggacaagctctctccgaggagc
mmu-mir-300 gctacTTGAAGAGAGGTTATCCTTTGTgtgtttgtttacgcgaaatgaaTATGCAAGGGCAAGCTCTCTTCgaggagc
60042_15 ATATGCAAGGGCAAGCTCTCTT 834,796,38,22,21,1,3
164145_4 ATATGCAAGGGCAAGTTCTCT 768,745,23,21,20,1,3
228913_3 TATGCAAGGGCAAGCTCTCTT 812,773,39,21,20,1,3
208072_3 ATATGCAAGGGCAAGATCTCT 755,737,18,21,20,1,3
233446_3 ATATGCAAGGGCACGCTCTCT 663,646,17,21,20,1,3
333145_2 GTATGCAAGGGCAAGCTCTCT 687,666,21,21,20,1,3
313346_2 TATGCAAGGGCAAGCCCTCT 509,495,14,20,19,1,3
258122_2 NTATGCAAGGGCAAGCTCTCT 465,459,6,21,20,1,3
686399_1 AATATGCAAGGGCAATCTCTCT 754,746,8,22,21,1,3
837984_1 ATATGCAGGGGCAAGCTCTC 706,695,11,20,19,1,3
1696615_1 ATATGCCAGGGCAAGCTCTCT 709,690,19,21,20,1,3
789266_1 TATGCAAGGGCAAGCTATCTT 665,654,11,21,20,1,3
620190_1 ATATGCAAGGGCAACCTCTCT 656,645,11,21,20,1,3
462066_1 CGAATATGCAAGGGCAAGCTCT 655,636,19,22,21,1,3
488685_1 ATATGCAAGGGCAAGATCTC 647,634,13,20,19,1,3
650242_1 TATGCAAGGGCAAGCGCT 638,632,6,18,17,1,3
1880391_1 NATATGCAAGGGCAAGCTCTCT 551,543,8,22,21,1,3
525650_1 TATGCAAGGGCAAGCAGT 540,525,15,18,16,2,3
2007195_1 TATGCAAGGGAAAGCT 492,477,15,16,15,1,3
1790401_1 NGAATATGCAAGGGCAAGCTC 479,472,7,21,20,1,3
562993_1 NATGCAAGGGCAAGCTCTCT 478,472,6,20,19,1,3
860663_1 NGAATATGCAAGGGCAAGCTCT 399,394,5,22,21,1,3
cluster#=65 referenceSeqID=hsa-mir-1181 reads#=1 mir#=2
hsa-mir-1181 tccactgctgccgCCGTCGCCGCCACCCGAGCCGgagcgggctgggccgccaaggcaagatggtggactacagcgtgtggg
ppy-mir-1181 tccaccgctgccgCGGTCGCCGCCACCCGAGCCGgagcgggctgggccgccaaggcaagatggtggactacagcgtgtggg
1444223_1 CTGCCGCGGTCGCCC 476,460,16,15,14,1,5
cluster#=67 referenceSeqID=hsa-mir-4326 reads#=1 mir#=1
hsa-mir-4326 gctgctctgcTGTTCCTCTGTCTCCCAGACtctgggtggatggagcaggtcgggggcca
694427_1 NGGGTGGATGGAGCAGCACTGTCTT 50,34,16,25,17,8,3
cluster#=68 referenceSeqID=hsa-mir-3976 reads#=1 mir#=1
hsa-mir-3976 tgagggaTATAGAGAGCAGGAAGATTAATGTcatattggagttggactgcagggcttcctttacacaataaatattgtatgaagtgctgatgtaacctttactgcagcatgacatgggatttggctgtttttatggctc
1924096_1 GATATAGACAGCAGGACGGTGGCCC 526,491,35,25,17,8,5
cluster#=69 referenceSeqID=mmu-mir-2137 reads#=1 mir#=1
mmu-mir-2137 gtagtatacctccttcctgctgccttgttggcttGCCGGCGGGAGCCCCAGGGAGtagagcattgc
1802982_1 CCGGCGGGAGCCCCGGGGAGA 605,580,25,21,19,2,3
cluster#=70 referenceSeqID=rno-mir-24-2 reads#=1 mir#=2
rno-mir-24-2 gcctctccctgggctccgcctcctGTGCCTACTGAGCTGAAACAGTtgattccagtgcacTGGCTCAGTTCAGCAGGAACAGgagtccagcccccataggagctggca
rno-mir-24-1 -------------------ctccgGTGCCTACTGAGCTGATACAGttcatttcaca-cacTGGCTCAGTTCAGCAGGAACAGgag-----------------------
2048066_1 TCTCCCGGGGCTCCGCCTGTCTGAGCGTCGCT 64,38,26,32,19,13,5
cluster#=71 referenceSeqID=bta-mir-2881 reads#=1 mir#=1
bta-mir-2881 tgtgtttgggagttgGGGGCGGGGGGGCGGGTGgattccagctgtcttcccctcgtggacactgtgacata
1092217_1 GGGGGCGGGCGGGCGGCA 327,321,6,18,15,3,5
cluster#=72 referenceSeqID=bta-mir-2312 reads#=1 mir#=1
bta-mir-2312 ttgggctggccaaacagtttgtctgggttattctgtaacttggAAAACCTGAACGAACTTTTCggcccaccaa
874375_1 NAAAACCTGAACGAACTTTTTG 44,40,4,22,20,2,3
cluster#=73 referenceSeqID=ppy-mir-621 reads#=1 mir#=1
ppy-mir-621 tagattgaggaaggggctgagtggtaggcagtgctgctgtgcgttgatgaagacccatgtGGCTGGCAACAGCTCTTACCTtttgtctctgggtcc
505585_1 TGTGCGTCGATGAAGAACG 38,32,6,19,16,3,5
cluster#=74 referenceSeqID=hsa-mir-3934 reads#=2 mir#=1
hsa-mir-3934 cacagcccttcctgtccccagtttTCAGGTGTGGAAACTGAGGCAGgaggcagtgaagtaacttgctcaggttgcacagctgggaagtggagcagggatttgaatcc
456406_1 TGAGGCAGGAGGCTGTATGGTT 74,64,10,22,17,5,5
868271_1 TGAGGCAGGAGGCTGTATCGTT 44,34,10,22,17,5,5
cluster#=75 referenceSeqID=cfa-mir-718 reads#=3 mir#=1
cfa-mir-718 gcggcggcggcgggcaagatggcggcgggcccgggccccgcccCTTCCGCCCCGCCGGGCGCCGcacgaggc
577778_2 CGGCGGCGGCGGGCACTCTGGACGCGG 417,407,10,27,22,5,5
1070395_1 CGGCGGCGGCGGGGAATCTGGACGCG 337,327,10,26,21,5,5
cluster#=76 referenceSeqID=hsa-mir-4500 reads#=1 mir#=1
hsa-mir-4500 caggagagaaagtactgcccagaagctaaagtgtagatcaaacgcataatggcTGAGGTAGTAGTTTCTTgaactt
1047569_1 TGAGGTAGTAGATTCTATAGCT 388,364,24,22,18,4,3
cluster#=77 referenceSeqID=oan-mir-1383 reads#=1 mir#=1
oan-mir-1383 ttctcactaaggcacaatggagccttttttcataatggggagggtatcagaagccataagtcctggctcactggtttttccTTGGTCCCCTTCCCCCCGgaaagaaacgcaggccttcatgtagaa
1480767_1 TTTGGTCCCCTTCCCCCCGCTGCTCC 380,354,26,26,18,8,3
cluster#=78 referenceSeqID=cfa-mir-409 reads#=1 mir#=1
cfa-mir-409 aggttacccgagcaactttgcatctggacgacgAATGTTGCTCGTTGAACCCCT
998940_1 CGAATGTTGCGCGTTGAACCCAT 77,73,4,23,21,2,3
cluster#=79 referenceSeqID=hsa-mir-3714 reads#=1 mir#=1
hsa-mir-3714 GAAGGCAGCAGTGCTCCCCTGTgacgtgctccatcaccgggcagggaagacaccgctgccacctc
1333821_1 ACACCGCTGCCACCA 30,28,2,15,14,1,3
cluster#=80 referenceSeqID=bta-mir-3432-1 reads#=1 mir#=2
bta-mir-3432-1 cttcgatctttgtcatggtgTGCGGGATCTTTAGTTGTGGTGtgcaaactctcagttgcagcttgtgggatccagttccatgaccaaggattggacc
bta-mir-3432-2 aaacagccgacgttgcggcaTGCGGGATCTTTAGTTGTGGTGtgtgaattcttagttgcagcaactaaagatccctcaggctgcaatgaagatcaga
1337044_1 TTTAGTTGTGGTGTGTGAACTCTTAG 747,723,24,26,25,1,5
